**Amphipathic helices of cellular proteins can replace the helix in M2  
of Influenza A virus with only small effects on virus replication**

**Bodan Hu<sup>a</sup>, Stefanie Siche<sup>a</sup>, Lars Möller<sup>b</sup>, Michael Veit<sup>a</sup> #**

<sup>a</sup> Institut für Virologie, Freie Universität Berlin, Berlin, Germany.

<sup>b</sup> Robert Koch-Institut, Seestr. 10, Berlin, Germany

Running head: Amphiphilic helix of M2

#Address correspondence to Michael Veit: [mveit@zedat.fu-berlin.de](mailto:mveit@zedat.fu-berlin.de)

Word count for the abstract: 225

Word count for the text: 6255

Keywords: Influenza virus; M2; assembly; budding; amphiphilic helix; membrane curvature;

ALPS; Epsin

## Abstract

1 M2 of influenza virus functions as proton channel during virus entry. In addition, an  
2 amphipathic helix in its cytoplasmic tail plays a role during budding. It targets M2 to the  
3 assembly site where it inserts into the inner membrane leaflet to induce curvature that causes  
4 virus scission. Since vesicularisation of membranes can be performed by a variety of  
5 amphiphilic peptides we used reverse genetics to investigate whether they can substitute for  
6 M2's helix.

7 Virus could not be generated if M2's helix was deleted or replaced by a peptide predicted not  
8 to form an amphiphilic helix. In contrast, viruses could be rescued if the M2 helix was  
9 exchanged by helices known to induce membrane curvature. Infectious virus titers were  
10 marginally reduced if M2 contains the helix of the amphipathic lipid packing sensor, from the  
11 Epsin N-Terminal Homology domain or the non-natural membrane inducer RW16.  
12 Transmission EM of infected cells did not reveal unequivocal evidence that virus budding or  
13 membrane scission was disturbed in any of the mutants. Instead, individual virus mutants  
14 exhibit other defects in M2, such as reduced surface expression, incorporation into virus  
15 particles and ion channel activity. The protein composition and specific infectivity was also  
16 altered for mutant virions. We conclude that the presence of an amphiphilic helix in M2 is  
17 essential for virus replication, but other helices can replace its basic (curvature-inducing)  
18 function.

## 19 **Importance**

20 Influenza is unique among enveloped viruses since it does not rely on the cellular ESCRT-  
21 machinery for budding. Instead viruses encode their own scission machine, the M2 protein.  
22 M2 is targeted to the edge of the viral assembly site where it inserts an amphiphilic helix into  
23 the membrane to induce curvature. Cellular proteins utilize a similar mechanism for scission  
24 of vesicles. We show that the helix of M2 can be replaced by helices from cellular proteins  
25 with only small effects on virus replication. No evidence was obtained that budding is  
26 disturbed, but individual mutants exhibit other defects in M2 which explain the reduced virus  
27 titers. In contrast, no virus could be generated if the helix of M2 is deleted or replaced by  
28 irrelevant sequences. These experiments support the concept that M2 requires an amphiphilic  
29 helix to induce membrane curvature, but its biophysical properties are more important than  
30 the amino acid sequence.

## 31 **Introduction**

32 Influenza A viruses are pleomorphic enveloped viruses in the family *Orthomyxoviridae*. Their  
33 membrane is lined from beneath by a protein layer composed of the matrix protein M1, which  
34 in turn envelopes the viral genome, arranged as eight viral ribonucleoprotein particles  
35 (vRNPs), each composed of a segment of viral RNA complexed to the nucleoprotein (NP) and  
36 the subunits of the viral RNA polymerase. The membrane contains three transmembrane  
37 proteins, the glycoproteins hemagglutinin (HA), which catalyzes virus entry by receptor-  
38 binding and membrane fusion after virus-uptake into endosomes and the neuraminidase (NA),  
39 which is required for release of particles from infected cells (1). The tetrameric proton  
40 channel protein M2 is activated by the acidic pH in the endosome and the resulting proton  
41 flux into the interior of the virus is important for genome unpacking (2-4).

42 M2 is a type III transmembrane protein; the first 24 amino acids form the ectodomain, which  
43 contains an unused glycosylation site and two cysteines which build intermolecular  
44 disulphide-linkages, which however, are not required for tetramer formation (5, 6). The  
45 following 19 residues are the transmembrane region (TMR), which, including a few amino  
46 acids on both sides, is the functional core of the proton channel (7). The remaining 54  
47 residues build up the cytoplasmic tail, which is essential for virus replication (8). Amino acids  
48 48 – 58 following the TMR shape a membrane-parallel amphiphilic helix (9). This region  
49 (residues 45-69), but also residues 71–73 contain a binding site for the viral matrix protein  
50 M1 (10, 11). The interaction with M2 is required for transport of M1 from internal  
51 membranes, where it accumulates in the absence of other virus proteins, to the viral budzone  
52 (12, 13), a cholesterol- and sphingomyelin-enriched area of the plasma membrane. The  
53 cytoplasmic tail (residues 91 to 94) also binds to the autophagy protein LC3 and recruits LC3-  
54 containing vesicles to the plasma membrane, a process that is required for budding of  
55 filamentous particles and enhances the environmental stability of virions (14).

56 In the infected cell, all viral components are synthesized and ultimately transported to the  
57 plasma membrane for assembly and budding of progeny virions (15, 16), which occurs in  
58 cholesterol- and sphingolipid-enriched nanodomains of the plasma membrane (rafts) (17). HA  
59 and NA have intrinsic features that target the proteins to the cholesterol-enriched domains  
60 (18), but M2 is not a raft component (19). Nevertheless, M2 co-cluster at the plasma  
61 membrane with HA as assessed by FRET and quantitative electron microscopy (20, 21).  
62 It was originally proposed that targeting to the HA-defined budding zone is achieved by two  
63 features: attachment of palmitic acid to cysteine residue 50 (22, 23), and cholesterol binding  
64 (24), mediated by cholesterol recognition/interaction amino acid consensus (CRAC) motifs,  
65 present up to four times in the amphiphilic helix region of M2 (25). However, it was then  
66 shown that mutations in either the acylation site or in the CRAC motifs, or in both motifs  
67 simultaneously do not affect clustering of M2 with HA (26) and virus growth in cell culture  
68 (27-29). However, a recent NMR analysis indicated that cholesterol binds the C-terminal part  
69 of the transmembrane region and is oriented parallel to the bilayer normal, without  
70 requirement of the CRAC motif (30).  
71 Targeting to the budding zone might be achieved by the ability of M2's helix to sense  
72 membrane curvature as shown by preferential binding of M2 to small unilamellar vesicles  
73 (SUVs) having a small diameter and by molecular dynamics simulations (31, 32). More  
74 specifically, clusters of M2 molecules are excluded from regions with negative curvature, i. e.  
75 the outward part of a budding virus particle, but rather accumulate at membrane regions with  
76 positive curvature, i. e. the neck of a budding virus (33).  
77 Positioning of M2 at the edge of the viral budding zone could then entail the scission of virus  
78 particles: the amphiphilic helix was proposed to induce curvature by wedge-like integration  
79 into the membrane (34). Indeed, there is experimental evidence from membrane model system  
80 that M2 plays an active role in scission. M2 as well as a peptide encompassing the

81 amphiphilic helix induce membrane curvature in large unilamellar vesicles (LUVs) and  
82 causes budding of vesicles into giant unilamellar vesicles (GUVs) (35, 36). Detailed studies  
83 with peptides showed that the amphipathic  $\alpha$ -helix folds upon contact with membranes.  
84 Membrane binding requires hydrophobic interactions with the lipid tails but not charged  
85 interactions with the lipid headgroups (31, 32).

86 In the context of a virus infection it was shown that replacement of residues in the membrane-  
87 inserted hydrophobic face of the amphiphilic helix leads to modest or large attenuation of  
88 recombinant viruses in cell culture, and to changes in morphology of both filamentous and  
89 spherical virus strains. Especially undetached mutant viruses with a bead-on-a-string  
90 morphology where individual virions fail to be separated from each other and/or from the  
91 plasma membrane are characteristic of incomplete virus scission (36-38).

92 A multitude of amphipathic helices that interact with membranes have been characterized in  
93 cellular proteins. Amphipathic helices are arranged parallel to the bilayer, partially penetrate it  
94 via their hydrophobic face and are well suited for membrane deformation and curvature  
95 sensing. Their interactions are mostly reversible and restricted to certain cellular membranes  
96 in order to allow the respective protein to fulfil a specific cellular function (39). One type of  
97 helix induces membrane curvature by inserting into one leaflet of a bilayer like a wedge. A  
98 well investigated example is the  $\alpha$ 0-helix of the Epsin N-Terminal Homology (ENTH)  
99 domain, which is present in the Epsin family of proteins that are involved in clathrin-mediated  
100 endocytosis. The whole ENTH-domain is composed of several helices that bind specifically to  
101 PtdIns(4,5)P<sub>2</sub>, a lipid present in the inner leaflet of the plasma membrane. Upon binding to  
102 PtdIns(4,5)P<sub>2</sub>, the unstructured N-terminal residues of the ENTH domain fold into the  $\alpha$ 0-  
103 helix, that subsequently inserts into the inner leaflet of the plasma membrane resulting in  
104 separation of lipid polar heads. The specificity for PtdIns(4,5)P<sub>2</sub> and subsequent membrane  
105 insertion is also observed in the isolated  $\alpha$ 0-helix (40-44).

106 Instead of inducing membrane curvature, another type of amphipathic helix senses curvature  
107 by insertion of bulky hydrophobic residues between loosely packed lipids. The most notable  
108 example is the ALPS (amphipathic lipid packing sensor) motif found within the Golgi-  
109 associated ArfGAP1 protein. The ALPS motif forms an  $\alpha$ -helix only upon binding to highly  
110 curved membranes, e.g. to vesicles which have a small radius compared to the rather flat  
111 donor membrane. This helix differs from classical amphipathic helices by the abundance of  
112 serine and threonine residues on its polar face. Upon lipid-binding ArfGap1 activates the  
113 GTPase activity of Arf1, which in turn leads to disassembly of the coat of COPI vesicles,  
114 carriers for retrograde transport from the Golgi apparatus to the ER (45-47).

115 Amphipathic helices can also function as cell-penetrating peptides (CPPs), which are used to  
116 deliver membrane impermeable agents through both leaflets of a membrane into cells. The  
117 first identified CPPs were composed of only basic amino acids, but peptides containing both  
118 basic and hydrophobic amino acids are more effective. Amphipathic CPPs, such as the  
119 peptide RW16, bind parallel to the membrane at low concentrations, but at high  
120 concentrations insert perpendicularly causing membrane curvature and leakage as well as  
121 lipid domain separation and changes in membrane fluidity and cholesterol distribution (48,  
122 49).

123 Since the mentioned peptides exhibit similar biophysical features and membrane sensing and  
124 modulating activities but have a completely different amino acid sequence, we asked whether  
125 they can replace the amphiphilic helix of M2 within the context of a virus infection.

## 126 **Material and Methods**

### 127 **Cell culture**

128 Madin Darby canine kidney (MDCK II) cells and human embryonic kidney 293T cells were  
129 grown in DMEM (Dulbecco's Modified Eagle Medium, PAN, Aidenbach, Germany)  
130 supplemented with 10% FCS (fetal calf serum, Perbio, Bonn, Germany), 100 units/ml  
131 penicillin and 100 µg/ml streptomycin at 37 °C and 5% CO<sub>2</sub>.

132

### 133 **Mutagenesis, generation of recombinant virus, growth curves**

134 Recombinant influenza A/WSN/33 (H1N1) virus was generated using an eight-plasmid  
135 reverse genetics system (50), where each plasmid contains the cDNA of one viral RNA  
136 segment, flanked by suitable promoters. In brief, 293T cells in 60mm dishes were co-  
137 transfected with 8 plasmids (1µg each) with TurboFect transfection reagent. 4-6h post  
138 transfection, culture medium was changed to infection medium (DMEM) supplemented with  
139 0.1% FBS, 0.2% BSA and 1 µg/ml TPCK-Trypsin). 48h post transfection, culture supernatant  
140 was harvested, centrifuged at 4000g for 5min to clear from cell debris and stored at -80°C or  
141 directly passaged onto MDCK II cells for further amplification.

142 To generate mutations in the amphiphilic helix of M2 the M1/M2-encoding cDNA segment 7  
143 was digested with StuI and Nae I, and a synthetic cDNA sequence was inserted which does  
144 not encode the amino acids 48-62 (FKCIYRRFKYGLKRG) that encompass the amphiphilic  
145 helix. The synthetic cDNA contains sites for the restriction enzymes ClaI and BspEI at the  
146 beginning and end of the amphiphilic helix, which were used to insert synthetic DNA  
147 sequences that encode the internal helix from ArfGAP1  
148 (FLNSAMSSLYSGWSSFTTGASKFAS, M2 ALPS), the curvature sensing  $\alpha$ 0-helix of the  
149 ENTH domain from Epsin 1 (SSLRRQMKNIVHN, M2 Epsin) or the artificial cell-  
150 penetrating RW16 peptide (RRWRRWRRWRRWRR, M2 RW16). Two of the mutants



151 contained scrambled M2 sequences; one from the WSN virus (KYGCFRYFIKRGKLR, M2  
152 sWSN), the other from the Udorn strain (FFKLGYLEFKIFRGCRH, M2 sUdorn).

153 To investigate virus growth MDCK II cells were seeded into 6-well or 24-well plates one day  
154 before infection so they could be nearly 100% confluent the next day. Cells were then  
155 infected with WSN WT or M2 mutants with an m.o.i of 0.001 (for multiple replication cycle)  
156 or 1 (for single replication cycle). After binding for 1h, cells were washed once with DMEM  
157 and fresh infection medium was added. An aliquot of the cell culture supernatant was  
158 harvested at 9h, 23h, 34h and 47h (multiple replication cycle) or at 6h and 9h (single  
159 replication cycle) post infection, cleared from cell debris (2000g, 5min) and titrated by  
160 plaque-assay.

161 For the virus samples collected at 34h post infection, the copy number of vRNA segment M  
162 and NA was also determined by RT-qPCR. Viral RNA was extracted from the same volume  
163 of cell culture supernatant with RTP DNA/RNA Virus Mini Kit (Stratec) according to the  
164 instruction. The amount of M and NA segment was determined with one-step RT-qPCR using  
165 SensiFAST™ Probe Lo-ROX One-Step Kit (Bioline). The sequences of primers and probe for  
166 M segment detection are AGA TGA GYC TTC TAA CCG AGG TCG (forward primer),  
167 TGC AAA NAC ATC YTC AAG TCT CTG (reverse primer) and TCA GGC CCC CTC  
168 AAA GCC GA (probe). The sequences of primer and probe for NA segment detection are  
169 TGG GTC AAT CTG TAT GGT AGT C (forward primer), GCT GCC TTG GTT GCA TAT  
170 T (reverse primer) and TGG ATT AGC CAT TCA ATT CAA ACC GGA (probe). The  
171 plasmids for reverse genetics were used as standard to calculate the copy number.

172 To assess stability of virus particles WSN WT and mutant viruses were diluted with infection  
173 medium to 200000 PFU/ml. 500 µl virus (i.e. 100.000 PFU) was put into 24-well plates,  
174 which were incubated at 37°C and 5% CO<sub>2</sub>. One aliquot was removed every day and titers  
175 were determined by plaque assay.

176 Plaque assay was performed on MDCK II cells in six well plates. Cells were infected with  
177 serial 10fold dilutions of virus, incubated for 1h at 37 °C, washed with PBS and overlaid with  
178 2X MEM (Minimum Essential Medium), 1.25% Avicel (FMC BioPolymer), 1% NaHCO<sub>3</sub>,  
179 0.1% FCS, 0.2% BSA (dissolved in H<sub>2</sub>O) and 2µg/ml TPCK-trypsin. After incubation for  
180 48h at 37 °C the cell cultures were fixed with 4% PFA, cells were stained with 0.1% crystal  
181 violet, and the plaques were counted.

182

### 183 **Virus purification, SDS-PAGE and Western blot**

184 MDCK II cells were infected with WSN WT or mutants at an m.o.i of 0.001. 48h post  
185 infection, culture supernatant was harvested, centrifuged at 4000g for 5min to clear from cell  
186 debris and viruses were pelleted (100.000g, 2h). Pelleted viruses were then loaded onto a  
187 continuous 20-60% sucrose gradient and centrifuged at 100.000g for 4h. Visible virus bands  
188 at a density of 35-50% were collected and resuspended in 1X TNE buffer (10 mM Tris, 100  
189 mM NaCl und 1 mM EDTA, pH 7.4) and again pelleted.

190 For analysis of the viral protein composition, purified viruses were subjected to 12% SDS-  
191 PAGE under non-reducing condition and Coomassie staining.

192 To determine the amount of M2 in virus particles, purified virus preparations were subjected  
193 to SDS-PAGE under reducing condition. Gels were blotted onto polyvinylidene difluoride  
194 (PVDF) membrane (GE Healthcare). After blocking of membranes (blocking solution: 5%  
195 skim milk powder in PBS with 0.1% Tween-20 (PBST)) for 1h at room temperature, they  
196 were incubated with either anti-M2 mAb (14C2; Santa Cruz) or anti-M1 mAb (Abcam)  
197 overnight at 4°C. After washing (3x10 min with PBST), horseradish peroxidase-coupled  
198 secondary antibody (anti-mice or anti-goat, Sigma-Aldrich, Taufkirchen, Germany, 1:5000)  
199 was applied for 1h at room temperature. After washing, signals were detected by  
200 chemiluminescence using the ECLplus reagent (Pierce/Thermo, Bonn, Germany) and a

201 Fusion SL camera system (Peqlab, Erlangen, Germany). The density of bands was analyzed  
202 with Image J software.

203

### 204 **Immunofluorescence microscopy and flow cytometry**

205 To assess the subcellular localization of M2 by immunofluorescence microscopy, MDCK II  
206 cells grown in 6-well plates were infected with WSN WT and mutants with a m.o.i. of 1. The  
207 cells were fixed 4.5h after infection with 4% (w/v) paraformaldehyde in PBS for 20min,  
208 permeabilized with 0.1% Triton X-100 in PBS for 10 min, blocked (3% BSA in PBS  
209 for 1h) and incubated with primary anti-M2 mAb14C2 (1:300 in PBS supplemented with 3%  
210 BSA, Santa Cruz) for 1h and then with anti-mouse secondary antibody coupled to Alexa Fluor  
211 488 (1:1000, Sigma) for 30min. Washing with PBS (three times, each for 2min) was  
212 performed between each step. Pictures were recorded with a Zeiss Axio Vert A1 inverse  
213 epifluorescence microscope.

214 To quantify total and surface expression levels of M2 fluorescence intensities were  
215 determined by flow cytometry. MDCK II cells were infected with WSN WT and mutants with  
216 a m.o.i of 1, treated with trypsin/EDTA for detaching from the dishes at 4.5h post infection,  
217 pelleted (1200g, 5min), resuspended in growth medium for 30min, washed twice with PBS  
218 and fixed with 4% formaldehyde for 20min. For analysis of surface M2, cells were directly  
219 blocked with 3% BSA in PBS for 30min. For the total expression levels of M2, cells were  
220 additionally permeabilized with 0.1% triton X-100 for 10 min before blocking with BSA.  
221 Cells were incubated with primary anti-M2 mAb14C2 (1:300 in PBS supplemented with 3%  
222 BSA, Santa Cruz) for 1h, and then with anti-mouse secondary antibody coupled to Alexa  
223 Fluor 488 (1:1000, Sigma) for 30 min. The total fluorescence intensity was determined for  
224 single cells by flow cytometry; at least 100.000 cells were analyzed. Cells with fluorescence  
225 intensities below the value determined for mock infected cells were not taken into

226 consideration. From these data the mean fluorescence intensity was calculated and results for  
227 total and surface expression were normalized to surface expression of M2 WT in each of three  
228 infection experiments.

229

### 230 **M2 proton channel activity assay**

231 293T cells in 6-well plates at ~80% confluency were transfected with 3 $\mu$ g plasmid encoding  
232 eYFP using TurboFect transfection reagent (Thermo Fisher). 24h post transfection, cells were  
233 infected with WSN WT or mutants at a moi of 0.5. 16h after infection, cells were detached  
234 from plates and divided into two parts. One part was directly measured by flow cytometry to  
235 analyze the proton channel activity of M2; the other part was fixed and stained with anti-M2  
236 mAb 14C2 to determine the M2 amount in the plasma membrane of infected cells.

237 To analyze the proton channel activity, cells were washed twice with DPBS++ (DPBS with  
238 calcium and magnesium) and resuspended in DPBS++ at either pH7.2 or pH5.5. The mean  
239 fluorescence intensity (MFI) of eYFP of at least 10000 cells was measured every 40s. The  
240 MFI at pH7.2 at the starting time point (T=0) was normalized to 100% and its change was  
241 plotted against time.

242 To determine the M2 amount at the plasma membrane, cells were fixed with 4%  
243 formaldehyde for 20min, blocked with 3% BSA in PBS for 30min, incubated with primary  
244 anti-M2 mAb (1:300 in PBS supplemented with 3% BSA; 14C2, Santa Cruz) for 1h, then  
245 with anti-mice secondary antibody Alexa Fluor 488 (1:1000, Sigma) for 30min and analyzed  
246 by flow cytometry. The mean fluorescence intensity was calculated from at least 10 000 cells.

247

### 248 **Transmission electron microscopy**

249 MDCK II cells were infected with wild-type and mutant viruses at a m.o.i of 0.001. 24-36h  
250 post infection, cells were harvested by scraping, pelleted (2000g, 5min, 4°C), washed twice

251 with HEPES (pH 7.2) and fixed in 2.5% glutaraldehyde in 50 mM HEPES (pH 7.2). After  
252 washing in 50 mM HEPES (pH 7.2), cell pellets were embedded in low-melting-point agarose  
253 (3% in ddH<sub>2</sub>O, at a ratio of 1:1). Cells were post-fixed with osmium tetroxide (1% in ddH<sub>2</sub>O  
254 for 1h), tannic acid [0.1 % in 50 mM HEPES (pH 7.2) for 30min] and uranyl acetate (2 %  
255 in ddH<sub>2</sub>O for 2h), dehydrated stepwise in a graded ethanol series and embedded in epon resin.  
256 Ultrathin sections (~60 nm) were prepared with an ultramicrotome (Leica Ultracut UCT) and  
257 counterstained with uranyl acetate (2% in ddH<sub>2</sub>O for 20min), followed by lead citrate  
258 (Reynolds' solution for 3min). Ultrathin sections were examined using a JEM-2100  
259 transmission electron microscope (JEOL) at 200 kV. Images were recorded using a Veleta  
260 CCD camera (EMSIS).

## 261 **Results**

### 262 **The presence of an amphipathic helix in M2 is essential for virus replication**

263 In order to investigate the role of the amphipathic helix of M2 for replication of the spherical  
264 WSN Influenza virus strain (A/WSN 1933, H1N1), residues 48-62 (amino acid sequence  
265 FKCIYRRFKYGLKRG) were deleted from the M2 protein.. We also generated four M2  
266 mutants where these amino acid sequences were replaced (Fig. 1). One mutant contained  
267 scrambled version of the amphipathic helix of M2 from the WSN virus  
268 (KYGCFRYFIKRGKLR, termed M2 sWSN) (36). We also exchanged M2's helix with three  
269 different helices, with the curvature sensing ALPS helix from ArfGAP1  
270 (FLNSAMSSLYSGWSSFTTGASKFAS, M2 Alps), with the curvature inducing  $\alpha$ 0-helix of  
271 the ENTH domain from Epsin 1 (SSLRRQMKNIVHN, M2 Epsin) and with the non-natural  
272 cell-penetrating RW16 peptide (RRWRRWRRWRRWRR, M2 RW), that was shown to  
273 cause budding of vesicles into GUVs, similar to the helix of M2 (36).

274 Amphipathic helices are characterized by two physicochemical parameters, the hydrophobic  
275 moment ( $\langle\mu_H\rangle$ ) and the average hydrophobicity ( $\langle H\rangle$ ). The hydrophobic moment quantifies  
276 amphipathicity as the mean vector sum of the hydrophobicities of the side chains if this region  
277 forms an  $\alpha$ -helix, whereas the hydrophobicity describes the avidity of the helix for lipids (51).  
278 Calculation of these parameters by heliquest (Fig. 1c) reveals that M2 WT and M2 sWSN  
279 have (since they are composed of identical amino acids) the same hydrophobicity (0.39), but  
280 the hydrophobic moment in the scrambled version is reduced from 0.39 to 0.11. M2 ALPS  
281 has a similar hydrophobic moment (0.311) as M2 WT and a higher overall hydrophobicity  
282 (0.544). M2 Epsin has a higher hydrophobic moment (0.608) compared to M2 WT, but a  
283 lower hydrophobicity (0.253). M2 RW16 has the highest hydrophobic moment (0.985) since  
284 the peptide is composed of only basic and hydrophobic residues which are perfectly aligned  
285 on the hydrophilic and hydrophobic face, respectively.

286 The mutant M2 plasmid together with plasmids encoding the other viral proteins were  
287 transfected into HEK 293T cells, the supernatant was used to infect MDCK II cells and  
288 release of virus particles was assessed by HA assay. In five independent transfections we  
289 never rescued virus particles which have a deleted helix or the scramble helix of the WSN  
290 strain, whereas wild-type virus and the other three mutants done in parallel exhibit HA titers  
291 of  $2^2$  - $2^6$ . From the rescued mutants a virus stock was generated in MDCK II cells and  
292 sequencing of the M2 gene showed that only the desired mutations were present (data not  
293 shown).

294 To compare the replication kinetics of the viruses, MDCK II cells were infected with WSN  
295 WT or with the mutants at a moi of 0.001, supernatants were collected at various time points  
296 post infection and virus titers were assessed by plaque assay (Fig. 2A). The growth curve  
297 from three infection experiments revealed a small, but statistically significant decrease in the  
298 infectious titer of all mutants (depending on the time point) by 1 to 2 logs. To assess whether  
299 mutant virus particles exhibit a reduced specific infectivity we also determined their HA-titers  
300 at 34 and 47 hours after infection from this experiment (Fig. 2B) and calculated the Pfu/HA  
301 ratios at 34 and 47 hours after infection. In general, they are higher at 34 hours compared to  
302 47 hours after infection, which suggests that virus assembly is more precise at earlier time  
303 points after infection. More importantly, at both time points the specific infectivity of WSN  
304 M2 ALPS and WSN M2 RW16 is (statistically significant) reduced compared to WSN M2  
305 Epsin and WSN M2 WT (Fig. 2C).

306 We then applied RT-qPCR using primers for the gene segments encoding M and NA,  
307 respectively to determine the number of total genome-containing particles released at 34h post  
308 infection from MDCK cells (Fig. 2D). The determined number was correlated with the  
309 infectious virus titer to calculate the ratio of fully infectious to total (genome-containing)  
310 particles, which is for wild type virus  $\sim 0.1$  if the vRNA encoding M is determined, and  $\sim 0.2$

311 for the NA gene segment. This is at the upper limit for previous estimates for the ratio of total  
312 to fully infectious particles which is in the range from 0.1 to 0.01 (52). When compared with  
313 WSN WT, WSN M2 Epsin exhibits a very similar ratio, while the other two mutants exhibit a  
314 3-5fold lower proportion of infectious to total particles, regardless of whether the M or NA  
315 gene segment were analyzed. In sum, whereas WSN WT and WSN Epsin produce the same  
316 ratio of infectious to total particles, the other two mutants produce relatively more non-  
317 infectious particles suggesting that the assembly process is less accurate in M2 ALPS and M2  
318 RW16.

319 In multiple cycle growth experiments a reduced virus titer might be due to a defect in virus  
320 budding, in virus entry or in both processes. Therefore, we analyzed virus growth also under  
321 one cycle growth conditions by infecting cells with the same m.o.i of 1 and determined virus  
322 titers at 6h and 9h post infection. Under those conditions WSN mutants showed no or only  
323 slightly (1log) lower titers than WSN WT, statistically significant different from WT only for  
324 M2 ALPS at 6h post infection (Fig. 2E). Although defects in virus release might add up after  
325 multiple cycles of replication, the result suggests that replacing the amphiphilic helix in M2  
326 causes defects in virus budding; entry of the resulting particles into cells is apparently also  
327 affected,.

328 M2 binds to the autophagy protein LC3 and recruits LC3-conjugated membranes to the viral  
329 budding site. This process is required for virus stability, probably because it delivers  
330 appropriate lipids to the plasma membrane during budding (14). This is especially evident for  
331 filamentous viruses, but the spherical PR8 viruses with a mutation in the LC3-binding domain  
332 also show a larger drop in virus titers after incubation at room temperature compared to the  
333 corresponding wild type virus. In addition, M2 binds cholesterol (24, 25, 36), a lipid that  
334 increases the rigidity of viral membranes and hence probably infectivity of viruses (53-56).  
335 To test the possibility that mutant viruses are more unstable than wild type virus we incubated



336  $2 \times 10^6$  infectious virus particles at 37°C for 4 days, removed an aliquot every day and  
337 determined the remaining vial infectivity (Fig. 2F). However, no difference was observed  
338 between WSN WT and mutant viruses, virus infectivity dropped by ~1log per day in all cases.

339

340 **Little evidence for impaired membrane scission by replacement of M2's amphiphilic**  
341 **helix**

342 Defects in budding might be reflected by aberrant morphology of the resulting virus particles.  
343 Especially if the last budding step (scission) is disturbed this might led to a 'beads-on-a-string'  
344 morphology, in which individual virions fail to be separated from each other and/or from the  
345 plasma membrane (35, 37). To examine whether the cellular helices present in M2 have an  
346 influence on virus budding, we applied transmission electron microscopy on ultrathin sections  
347 (~70nm) of MDCK II cells infected at a low m.o.i and prepared 24-36h after infection.  
348 Around 60 (WSN Epsin), 120 (WSN RW16) and 280 (WSN Alps) budding events were  
349 inspected, but no such morphology was observed for any of the mutants. However, for WSN  
350 RW16 we observed two virus particles still attached by a small neck to filopodia (Fig. 3G),  
351 but other particles apparently bud normally (Fig. 3H+I). WSN Epsin forms a few bacilliform  
352 particles (Fig. 3D). However, most virus particles were spherical for any mutant, yielding no  
353 evidence for drastic perturbation of virus morphology by mutations in M2. Thus, we obtained  
354 little evidence that the defects in growth of mutant viruses are due to impaired scission of  
355 particles from the plasma membrane of infected cells.

356

357 **M2 ALPS and M2 Epsin are less abundantly expressed at the plasma membrane**

358 One reason for the reduced virus titers might be a lower availability of mutant M2 at the  
359 budding site. To compare the intracellular distribution of wild type and mutant M2 proteins  
360 we used immunofluorescence of permeabilized MDCK II cells 4.5 hours after infection using

361 anti-M2 mAb 14C2. Wild-type M2 and each mutant is present at the plasma membrane, but  
362 cells also revealed bright perinuclear (presumably Golgi) and weaker reticular staining  
363 (possibly ER) throughout the cell (Fig. 4A).

364 We quantified the presence of wild-type and mutant M2 proteins at the cell surface in virus  
365 infected cells using antibody staining and flow cytometry. One aliquot of infected MDCK  
366 cells was permeabilised to determine total M2 expression levels; the other was left untreated  
367 to estimate cell surface fluorescence. Samples were incubated with the M2-antibody 14C2,  
368 which recognizes an epitope in the ectodomain of M2 (57), and fluorescent secondary  
369 antibody and the mean fluorescence intensity from  $10^5$  cells (minus background fluorescence  
370 of uninfected cells) was determined. Ratios of total versus surface expression were calculated  
371 and results were normalized against the surface expression level of M2-WT (=100%). The  
372 resulting graph from four different infection experiments reveal that surface expression of M2  
373 Epsin is (statistically significantly) reduced to 65% and M2 ALPS to 40%. (Fig. 4B).  
374 However, this is (manly) due to a reduction in the total expression of both mutants. If the ratio  
375 of surface expression to total expression is calculated and normalized to wild type no  
376 difference between M2 WT and the M2 mutants is obvious (Fig. 4C).

377

### 378 **Reduced amounts of M2 are incorporated into mutant virus particles**

379 Since especially M2 ALPS and M2 Epsin are less abundantly expressed at the plasma  
380 membrane, we asked whether they are less efficiently incorporated into virus particles. We  
381 purified WSN WT and WSN mutant virus particles with sucrose gradient centrifugation from  
382 MDCK II cells and used western blotting to visualize M2. To quantify the amount of M2 we  
383 related the chemiluminescent signal intensity for M2 to that of M1 probed in parallel on the  
384 same membrane. The results from three virus preparations (Fig. 5A+B) show that the relative  
385 amount of M2 is significantly reduced to ~25% in M2 ALPS, and M2 Epsin, but also in M2

386 RW16 relative to M2 WT (=100%).

387 M2 WT appears as two bands under reducing conditions, as observed previously (58). Mutant  
388 M2 proteins show a lower ratio of the 15kDa band relative to the 17kDa and a different SDS-  
389 PAGE mobility compared to M2 WT. The observed molecular weight does not always  
390 correspond to the predicted molecular weight; especially M2 ALPS runs faster than M2 WT  
391 although the inserted helix is larger than M2's authentic helix. Most likely, conformational  
392 aspects are involved, since M2 of different virus subtypes having the same number of amino  
393 acids run differently in SDS-PAGE (58).

394 Analyzing M2 proteins by non-reducing SDS-PAGE shows that each mutant forms disulfide-  
395 linked dimers and tetramers (Fig. 5C), to a similar extent as M2 WT (5). Thus, except for the  
396 slight anomaly in the SDS-PAGE mobility especially of M2 ALPS processing of mutants into  
397 tetramers is not disturbed.

398

### 399 **Reduced incorporation of M1 into mutant virus particles**

400 M2 contains a binding site in its cytoplasmic tail to recruit M1 from the Golgi to the plasma  
401 membrane (10, 11, 13). To determine whether mutant virus particles contain less M1 we  
402 analyzed the protein composition of three purified virus preparations by SDS-PAGE and  
403 coomassie staining (Fig. 6A). After non-reducing SDS-PAGE two bands with a molecular  
404 weight around 28kDa appeared; both react with M1-specific antibodies in a western-blot (Fig.  
405 6b). Densitometry of the major viral protein bands representing HA, NP and both M1 bands  
406 and calculation of their ratios indeed revealed that reduced amounts of M1 were incorporated  
407 into each mutant virus particles, most pronounced (and statistically significant) in WSN  
408 Epsin and WSN RW16, where it is reduced from 38% (WT) to 16% and 26%, respectively.  
409 The reduced amount of M1 is compensated in all mutants by relative higher amounts of HA  
410 (Fig. 6C). However, note that assembly of influenza viruses is in general of low fidelity, since

411 even genetically homogenous virus particles released from a single cell show enormous  
412 variation in size and protein composition, i. e. the copy number of individual proteins vary up  
413 to 100fold between virions (59).

414

#### 415 **Reduced ion channel activity of M2 ALPS and M2 Epsin**

416 The functional core of M2 consists of the transmembrane region (amino acids 21-51), but the  
417 amphiphilic helix is important for ion channel stability and maximal activity (7). To test  
418 whether replacement of the amphipathic helix in M2 affects its proton channel activity we  
419 used an established assay (60) to measure pH-dependent changes in the fluorescence intensity  
420 of the enhanced yellow fluorescent protein (eYFP) in transfected 293T cells which were also  
421 infected with Influenza virus. FACS analysis of cells incubated in neutral buffer yielded no  
422 change in mean fluorescence intensity (MFI) over time (Fig. 7A). Likewise, transfected, but  
423 uninfected cells did not reveal a change after acidification confirming the validity of the assay  
424 (Fig. 7B). However, low-pH treatment of infected cells resulted in an obvious decrease in  
425 MFI for all Influenza viruses, but the extent of the reduction differed between M2 WT and the  
426 mutants WSN Epsin and WSN ALPS. Since the extent of the reduction depends on the  
427 number of functional M2 channels on the cell surface, we also determined surface transport  
428 by staining of cells with M2 antibodies. All three mutants revealed a small reduction in  
429 surface staining (M2 RW16 to 95%, M2 ALPS and M2 Epsin to 80%), which is less  
430 pronounced compared to MDCK cells (Fig. 4B). However, the slope of the MFI curve is an  
431 intrinsic property of individual proton channels. Whereas WSN WT and WSN RW16 show an  
432 exponential decay in MFI in the first three minutes after acidification, it is less distinct in  
433 WSN Epsin and the decay is almost linear in M2 ALPS. We conclude, that the proton channel  
434 activity of M2 is reduced in WSN Epsin and especially in WSN ALPS, whereas WSN RW16  
435 does not exhibit a defect in ion transport.

## 436 **Discussion**

437 In this study, we show that the presence of an amphiphilic helix in the cytoplasmic tail of M2  
438 from the spherical WSN strain is essential for virus replication. Deletion of the helix or  
439 replacing it with a scrambled version that has the same amino acid composition but does not  
440 exhibit a significant hydrophobic moment, prevented generation of recombinant virus  
441 particles. However, the helix could be replaced with three different types of amphiphilic  
442 helices with only marginal effects (~1-2 log reduction) on virus titers. (Fig. 2). Thus, apart  
443 from being able to form an amphiphilic helix, there is apparently no strict amino acid  
444 sequence requirement in the region proximal to the transmembrane region of M2, as  
445 suggested previously (38).

446 Using ultrathin-section TEM of virus-infected cells we did not observe for any of our mutants  
447 virus particles with a bead-on-a-string (and only little evidence for any other altered)  
448 morphology as they were observed if bulky residues in the hydrophobic face of the helix of  
449 M2 from the Udorn or WSN strain were replaced by alanine (36, 37) or, in general, if viruses  
450 with a budding defect were investigated (61) (Fig. 3). This suggests (but does not prove) that  
451 virus budding and scission and hence induction of membrane curvature by the mutant M2  
452 proteins is not strongly impaired and thus the reduced virus titers might be also due to other  
453 defects in this protein.

454 Indeed, we observed various other deficiencies in M2 if the helix is replaced, which however  
455 differed between the M2 mutants. Two of the mutants, M2 ALPS and M2 Epsin are less  
456 abundantly expressed at the cell surface, mainly because their expression levels are decreased  
457 (Fig. 4). One might speculate that these mutant M2 proteins are not able to interact with one  
458 of the various cellular proteins, which are required to efficiently target M2 to the plasma  
459 membrane (36, 62, 63). Assuming that the amount of M2 at the plasma membrane is a  
460 limiting factor for the production of infectious virus particles, the reduced surface expression

461 of M2 ALPS and M2 Epsin might partly account for the reduced virus titers. This is consistent  
462 with a recent report describing that altering the expression and the intracellular targeting of  
463 M2 has major effects on virus replication (64).

464 Both M2 ALPS and M2 Epsin are also inefficiently incorporated into virus particles, the  
465 number of M2 molecules (relative to M1 WT) is reduced to ~25%. The same reduction was  
466 also determined for M2 RW16, although this M2 mutant has no (statistically significant)  
467 defect in cell surface transport. One might assume that M2 RW16 is not enriched at the viral  
468 budding site and therefore less efficiently incorporated into virus particles. The signals for co-  
469 clustering of M2 with HA are not (as initially assumed) palmitoylation and cholesterol-  
470 binding to the amphiphilic helix, but other amino acids in its hydrophobic face, such as  
471 isoleucine, phenylalanine and tyrosine (37). The helix of M2 RW16 contains only charged (R)  
472 and aromatic (W) amino acids and this might prevent privileged access to the viral assembly  
473 site. Whether M2 ALPS and M2 Epsin are enriched at the viral budding site cannot be  
474 concluded from our data. Note, however, that the  $\alpha$ 0-helix of Epsin binds to PtdIns(4,5)P2  
475 even outside of the ETNH-domain and that HA also co-localizes with PtdIns(4,5)P2 (65).  
476 Thus, the proposed mutual affinity of HA and M2 Epsin for this negatively charged lipid  
477 present only at the inner leaflet of the plasma membrane might cause their co-localization.

478 It is not understood why M2 is abundantly expressed in cells, but (in comparison to HA)  
479 largely excluded from virus particles (58). One reason for the high expression levels of M2  
480 might be that it interacts with the (also abundantly expressed) M1 protein in the Golgi to  
481 transport it by a piggy-back mechanism to the plasma membrane (13). Indeed, we observed  
482 that all virus particles having a mutant M2 contain reduced levels of M1, statistically  
483 significant for WSN Epsin and WSN RW16, regardless of whether the amount of mutant M2  
484 is also reduced (Fig. 6). Amino acids 71–73, but also residues 45-69 (which encompasses the  
485 amphiphilic helix) contain a binding site for M1 (10, 11) and thus replacement of the helix

486 might diminish binding to the matrix protein and hence its transport to the plasma membrane.  
487 Furthermore, the ratio of infectious to total virus particles is reduced in the mutants WSN  
488 ALPS and WSN RW16 by ~50%. This result was obtained both by calculating the PFU to  
489 HA-titer ratio as well as the PFU to M- and NA-genome segment containing particles (Fig. 2).  
490 This suggests that the regular assembly process is somewhat disturbed in the mutants WSN  
491 ALPS and WSN RW16 and therefore relatively more non-infectious virus particles are  
492 released.  
493 In addition, we determined that the proton channel activity of M2 Epsin and M2 ALPS is also  
494 compromised (Fig. 7). This, together with the observation that all mutant virus particles  
495 contain a reduced number of M2 proteins (Fig. 5), suggests that they might exhibit defects in  
496 virus entry. M2 mediated acidification of the virus interior must occur before the low pH in  
497 the endosome triggers HA-mediated membrane fusion. Otherwise the diffusion of protons  
498 from the endosome through the fusion pore into the cytosol would be faster than M2-mediated  
499 transport into virus particles (66, 67).  
500 In summary, we obtained only little evidence that scission of virus particles is disturbed if the  
501 amphiphilic helix of M2 is replaced by helices from cellular proteins having similar  
502 biophysical properties. Instead, we observed various other functional deficiencies in  
503 individual mutant M2 proteins, such as reduced exposure at the plasma membrane, reduced  
504 incorporation into virus particles and assembly defects, which might be responsible for the  
505 moderately reduced viral titers. Since we could not generate infectious virus if M2's helix was  
506 deleted or if it was replaced by a scrambled version that does not exhibit a hydrophobic  
507 moment, our data support the concept that the amphiphilic helix in M2 inserts into the lipid  
508 bilayer to sense membrane curvature at the neck of budding viruses and/or to induce  
509 membrane curvature that causes scission of virus particles. This is consistent with the concept

510 that M2 is member of a family of membrane scission proteins, which have similar biophysical  
511 properties, but no homology in the amino acid sequence (31).

512

### 513 **Acknowledgements**

514 This work was supported by the Human Frontiers Science Program (HFSP). Bodan Hu is  
515 recipient of a PhD fellowship from the China Scholarship Council (CSC). The funders had no  
516 role in study design, data collection and interpretation, or the decision to submit the work for  
517 publication.



## 518 **References**

- 519 1. Hutchinson EC. 2018. Influenza Virus. *Trends Microbiol* 26:809-810.
- 520 2. Li S, Sieben C, Ludwig K, Hofer CT, Chiantia S, Herrmann A, Eghiaian F, Schaap IA.  
521 2014. pH-Controlled two-step uncoating of influenza virus. *Biophys J* 106:1447-56.
- 522 3. Pinto LH, Holsinger LJ, Lamb RA. 1992. Influenza virus M2 protein has ion channel  
523 activity. *Cell* 69:517-28.
- 524 4. Stauffer S, Feng Y, Nebioglu F, Heilig R, Picotti P, Helenius A. 2014. Stepwise  
525 priming by acidic pH and a high K<sup>+</sup> concentration is required for efficient uncoating  
526 of influenza A virus cores after penetration. *J Virol* 88:13029-46.
- 527 5. Holsinger LJ, Lamb RA. 1991. Influenza virus M2 integral membrane protein is a  
528 homotetramer stabilized by formation of disulfide bonds. *Virology* 183:32-43.
- 529 6. Holsinger LJ, Shaughnessy MA, Micko A, Pinto LH, Lamb RA. 1995. Analysis of the  
530 posttranslational modifications of the influenza virus M2 protein. *J Virol* 69:1219-25.
- 531 7. Ma C, Polishchuk AL, Ohigashi Y, Stouffer AL, Schon A, Magavern E, Jing X, Lear  
532 JD, Freire E, Lamb RA, DeGrado WF, Pinto LH. 2009. Identification of the functional  
533 core of the influenza A virus A/M2 proton-selective ion channel. *Proc Natl Acad Sci U*  
534 *S A* 106:12283-8.
- 535 8. Iwatsuki-Horimoto K, Horimoto T, Noda T, Kiso M, Maeda J, Watanabe S, Muramoto  
536 Y, Fujii K, Kawaoka Y. 2006. The cytoplasmic tail of the influenza A virus M2 protein  
537 plays a role in viral assembly. *J Virol* 80:5233-40.
- 538 9. Sharma M, Yi M, Dong H, Qin H, Peterson E, Busath DD, Zhou HX, Cross TA. 2010.  
539 Insight into the mechanism of the influenza A proton channel from a structure in a  
540 lipid bilayer. *Science* 330:509-12.
- 541 10. Chen BJ, Leser GP, Jackson D, Lamb RA. 2008. The influenza virus M2 protein  
542 cytoplasmic tail interacts with the M1 protein and influences virus assembly at the site  
543 of virus budding. *J Virol* 82:10059-70.
- 544 11. McCown MF, Pekosz A. 2006. Distinct domains of the influenza a virus M2 protein  
545 cytoplasmic tail mediate binding to the M1 protein and facilitate infectious virus  
546 production. *J Virol* 80:8178-89.
- 547 12. Thaa B, Herrmann A, Veit M. 2009. The polybasic region is not essential for  
548 membrane binding of the matrix protein M1 of influenza virus. *Virology* 383:150-5.
- 549 13. Wang D, Harmon A, Jin J, Francis DH, Christopher-Hennings J, Nelson E, Montelaro  
550 RC, Li F. 2010. The lack of an inherent membrane targeting signal is responsible for  
551 the failure of the matrix (M1) protein of influenza A virus to bud into virus-like

- 552 particles. *J Virol* 84:4673-81.
- 553 14. Beale R, Wise H, Stuart A, Ravenhill BJ, Digard P, Randow F. 2014. A LC3-  
554 interacting motif in the influenza A virus M2 protein is required to subvert autophagy  
555 and maintain virion stability. *Cell Host Microbe* 15:239-47.
- 556 15. Chlanda P, Zimmerberg J. 2016. Protein-lipid interactions critical to replication of the  
557 influenza A virus. *FEBS Lett* 590:1940-54.
- 558 16. Rossman JS, Lamb RA. 2011. Influenza virus assembly and budding. *Virology*  
559 411:229-36.
- 560 17. Gerl MJ, Sampaio JL, Urban S, Kalvodova L, Verbavatz JM, Binnington B,  
561 Lindemann D, Lingwood CA, Shevchenko A, Schroeder C, Simons K. 2012.  
562 Quantitative analysis of the lipidomes of the influenza virus envelope and MDCK cell  
563 apical membrane. *J Cell Biol* 196:213-21.
- 564 18. Veit M, Thaa B. 2012. Association of influenza virus proteins with membrane rafts.  
565 *Adv Virol* 2011:370606.
- 566 19. Zhang J, Pekosz A, Lamb RA. 2000. Influenza virus assembly and lipid raft  
567 microdomains: a role for the cytoplasmic tails of the spike glycoproteins. *J Virol*  
568 74:4634-44.
- 569 20. Leser GP, Lamb RA. 2005. Influenza virus assembly and budding in raft-derived  
570 microdomains: a quantitative analysis of the surface distribution of HA, NA and M2  
571 proteins. *Virology* 342:215-27.
- 572 21. Thaa B, Herrmann A, Veit M. 2010. Intrinsic cytoskeleton-dependent clustering of  
573 influenza virus M2 protein with hemagglutinin assessed by FLIM-FRET. *J Virol*  
574 84:12445-9.
- 575 22. Sugrue RJ, Belshe RB, Hay AJ. 1990. Palmitoylation of the influenza A virus M2  
576 protein. *Virology* 179:51-6.
- 577 23. Veit M, Klenk HD, Kendal A, Rott R. 1991. The M2 protein of influenza A virus is  
578 acylated. *J Gen Virol* 72 ( Pt 6):1461-5.
- 579 24. Schroeder C, Heider H, Moncke-Buchner E, Lin TI. 2005. The influenza virus ion  
580 channel and maturation cofactor M2 is a cholesterol-binding protein. *Eur Biophys J*  
581 34:52-66.
- 582 25. Thaa B, Levental I, Herrmann A, Veit M. 2011. Intrinsic membrane association of the  
583 cytoplasmic tail of influenza virus M2 protein and lateral membrane sorting regulated  
584 by cholesterol binding and palmitoylation. *Biochem J* 437:389-97.
- 585 26. Thaa B, Siche S, Herrmann A, Veit M. 2014. Acylation and cholesterol binding are not

- 586 required for targeting of influenza A virus M2 protein to the hemagglutinin-defined  
587 budozone. FEBS Lett 588:1031-6.
- 588 27. Grantham ML, Wu WH, Lalime EN, Lorenzo ME, Klein SL, Pekosz A. 2009.  
589 Palmitoylation of the influenza A virus M2 protein is not required for virus replication  
590 in vitro but contributes to virus virulence. J Virol 83:8655-61.
- 591 28. Stewart SM, Wu WH, Lalime EN, Pekosz A. 2010. The cholesterol  
592 recognition/interaction amino acid consensus motif of the influenza A virus M2  
593 protein is not required for virus replication but contributes to virulence. Virology  
594 405:530-8.
- 595 29. Thaa B, Tievesch C, Moller L, Schmitt AO, Wolff T, Bannert N, Herrmann A, Veit M.  
596 2011. Growth of influenza A virus is not impeded by simultaneous removal of the  
597 cholesterol-binding and acylation sites in the M2 protein. J Gen Virol 93:282-92.
- 598 30. Elkins MR, Williams JK, Gelenter MD, Dai P, Kwon B, Sergeyev IV, Pentelute BL,  
599 Hong M. 2017. Cholesterol-binding site of the influenza M2 protein in lipid bilayers  
600 from solid-state NMR. Proc Natl Acad Sci U S A 114:12946-12951.
- 601 31. Martyna A, Bahsoun B, Badham MD, Srinivasan S, Howard MJ, Rossman JS. 2017.  
602 Membrane remodeling by the M2 amphipathic helix drives influenza virus membrane  
603 scission. Sci Rep 7:44695.
- 604 32. Martyna A, Gomez-Llobregat J, Linden M, Rossman JS. 2016. Curvature Sensing by a  
605 Viral Scission Protein. Biochemistry 55:3493-6.
- 606 33. Madsen JJ, Grime JMA, Rossman JS, Voth GA. 2018. Entropic forces drive clustering  
607 and spatial localization of influenza A M2 during viral budding. Proc Natl Acad Sci U  
608 S A 115:E8595-E8603.
- 609 34. Schroeder C. 2010. Cholesterol-binding viral proteins in virus entry and  
610 morphogenesis. Subcell Biochem 51:77-108.
- 611 35. Rossman JS, Jing X, Leser GP, Balannik V, Pinto LH, Lamb RA. 2010. Influenza virus  
612 m2 ion channel protein is necessary for filamentous virion formation. J Virol 84:5078-  
613 88.
- 614 36. Rossman JS, Jing X, Leser GP, Lamb RA. 2010. Influenza virus M2 protein mediates  
615 ESCRT-independent membrane scission. Cell 142:902-13.
- 616 37. Roberts KL, Leser GP, Ma C, Lamb RA. 2013. The amphipathic helix of influenza A  
617 virus M2 protein is required for filamentous bud formation and scission of filamentous  
618 and spherical particles. J Virol 87:9973-82.
- 619 38. Stewart SM, Pekosz A. 2011. Mutations in the membrane-proximal region of the

- 620 influenza A virus M2 protein cytoplasmic tail have modest effects on virus replication.  
621 *J Virol* 85:12179-87.
- 622 39. Gimenez-Andres M, Copic A, Antonny B. 2018. The Many Faces of Amphipathic  
623 Helices. *Biomolecules* 8.
- 624 40. Ford MG, Mills IG, Peter BJ, Vallis Y, Praefcke GJ, Evans PR, McMahon HT. 2002.  
625 Curvature of clathrin-coated pits driven by epsin. *Nature* 419:361-6.
- 626 41. Gleisner M, Kroppen B, Fricke C, Teske N, Kliesch TT, Janshoff A, Meinecke M,  
627 Steinem C. 2016. Epsin N-terminal Homology Domain (ENTH) Activity as a Function  
628 of Membrane Tension. *J Biol Chem* 291:19953-61.
- 629 42. Stahelin RV, Long F, Peter BJ, Murray D, De Camilli P, McMahon HT, Cho W. 2003.  
630 Contrasting membrane interaction mechanisms of AP180 N-terminal homology  
631 (ANTH) and epsin N-terminal homology (ENTH) domains. *J Biol Chem* 278:28993-9.
- 632 43. Yoon Y, Lee PJ, Kurilova S, Cho W. 2011. In situ quantitative imaging of cellular  
633 lipids using molecular sensors. *Nat Chem* 3:868-74.
- 634 44. Yoon Y, Tong J, Lee PJ, Albanese A, Bhardwaj N, Kallberg M, Digman MA, Lu H,  
635 Gratton E, Shin YK, Cho W. 2009. Molecular basis of the potent membrane-  
636 remodeling activity of the epsin 1 N-terminal homology domain. *J Biol Chem*  
637 285:531-40.
- 638 45. Bigay J, Casella JF, Drin G, Mesmin B, Antonny B. 2005. ArfGAP1 responds to  
639 membrane curvature through the folding of a lipid packing sensor motif. *EMBO J*  
640 24:2244-53.
- 641 46. Mesmin B, Drin G, Levi S, Rawet M, Cassel D, Bigay J, Antonny B. 2007. Two lipid-  
642 packing sensor motifs contribute to the sensitivity of ArfGAP1 to membrane  
643 curvature. *Biochemistry* 46:1779-90.
- 644 47. Nepal B, Leveritt J, 3rd, Lazaridis T. 2018. Membrane Curvature Sensing by  
645 Amphipathic Helices: Insights from Implicit Membrane Modeling. *Biophys J*  
646 114:2128-2141.
- 647 48. Lamaziere A, Burlina F, Wolf C, Chassaing G, Trugnan G, Ayala-Sanmartin J. 2007.  
648 Non-metabolic membrane tubulation and permeability induced by bioactive peptides.  
649 *PLoS One* 2:e201.
- 650 49. Maniti O, Piao HR, Ayala-Sanmartin J. 2014. Basic cell penetrating peptides induce  
651 plasma membrane positive curvature, lipid domain separation and protein  
652 redistribution. *Int J Biochem Cell Biol* 50:73-81.
- 653 50. Hoffmann E, Neumann G, Kawaoka Y, Hobom G, Webster RG. 2000. A DNA

- 654 transfection system for generation of influenza A virus from eight plasmids. *Proc Natl*  
655 *Acad Sci U S A* 97:6108-13.
- 656 51. Eisenberg D, Weiss RM, Terwilliger TC. 1982. The helical hydrophobic moment: a  
657 measure of the amphiphilicity of a helix. *Nature* 299:371-4.
- 658 52. Brooke CB. 2014. Biological activities of 'noninfectious' influenza A virus particles.  
659 *Future Virol* 9:41-51.
- 660 53. Biswas S, Yin SR, Blank PS, Zimmerberg J. 2008. Cholesterol promotes hemifusion  
661 and pore widening in membrane fusion induced by influenza hemagglutinin. *J Gen*  
662 *Physiol* 131:503-13.
- 663 54. Domanska MK, Dunning RA, Dryden KA, Zawada KE, Yeager M, Kasson PM. 2015.  
664 Hemagglutinin Spatial Distribution Shifts in Response to Cholesterol in the Influenza  
665 Viral Envelope. *Biophys J* 109:1917-24.
- 666 55. Hu B, Hofer CT, Thiele C, Veit M. 2019. Cholesterol Binding to the Transmembrane  
667 Region of a Group 2 Hemagglutinin (HA) of Influenza Virus Is Essential for Virus  
668 Replication, Affecting both Virus Assembly and HA Fusion Activity. *J Virol* 93.
- 669 56. Sun X, Whittaker GR. 2003. Role for influenza virus envelope cholesterol in virus  
670 entry and infection. *J Virol* 77:12543-51.
- 671 57. Zebedee SL, Lamb RA. 1988. Influenza A virus M2 protein: monoclonal antibody  
672 restriction of virus growth and detection of M2 in virions. *J Virol* 62:2762-72.
- 673 58. Lamb RA, Zebedee SL, Richardson CD. 1985. Influenza virus M2 protein is an  
674 integral membrane protein expressed on the infected-cell surface. *Cell* 40:627-33.
- 675 59. Vahey MD, Fletcher DA. 2018. Low-Fidelity Assembly of Influenza A Virus Promotes  
676 Escape from Host Cells. *Cell* 176:281-294 e19.
- 677 60. Stewart SM, Pekosz A. 2011. The influenza C virus CM2 protein can alter intracellular  
678 pH, and its transmembrane domain can substitute for that of the influenza A virus M2  
679 protein and support infectious virus production. *J Virol* 86:1277-81.
- 680 61. Jin H, Leser GP, Zhang J, Lamb RA. 1997. Influenza virus hemagglutinin and  
681 neuraminidase cytoplasmic tails control particle shape. *EMBO J* 16:1236-47.
- 682 62. Tripathi S, Pohl MO, Zhou Y, Rodriguez-Frandsen A, Wang G, Stein DA, Moulton  
683 HM, DeJesus P, Che J, Mulder LC, Yanguez E, Andenmatten D, Pache L,  
684 Manicassamy B, Albrecht RA, Gonzalez MG, Nguyen Q, Brass A, Elledge S, White  
685 M, Shapira S, Hacohen N, Karlas A, Meyer TF, Shales M, Gatorano A, Johnson JR,  
686 Jang G, Johnson T, Verschuere E, Sanders D, Krogan N, Shaw M, Konig R, Stertz S,  
687 Garcia-Sastre A, Chanda SK. 2015. Meta- and Orthogonal Integration of Influenza

- 688 "OMICs" Data Defines a Role for UBR4 in Virus Budding. *Cell Host Microbe* 18:723-  
689 35.
- 690 63. Zhu P, Liang L, Shao X, Luo W, Jiang S, Zhao Q, Sun N, Zhao Y, Li J, Wang J, Zhou  
691 Y, Zhang J, Wang G, Jiang L, Chen H, Li C. 2016. Host Cellular Protein  
692 TRAPPC6ADelta Interacts with Influenza A Virus M2 Protein and Regulates Viral  
693 Propagation by Modulating M2 Trafficking. *J Virol* 91.
- 694 64. Wohlgemuth N, Lane AP, Pekosz A. 2018. Influenza A Virus M2 Protein Apical  
695 Targeting Is Required for Efficient Virus Replication. *J Virol* 92.
- 696 65. Curthoys NM, Mlodzianoski MJ, Parent M, Butler MB, Raut P, Wallace J, Lilieholm J,  
697 Mehmood K, Maginnis MS, Waters H, Busse B, Zimmerberg J, Hess ST. 2019.  
698 Influenza Hemagglutinin Modulates Phosphatidylinositol 4,5-Bisphosphate Membrane  
699 Clustering. *Biophys J* 116:893-909.
- 700 66. Akole A, Warner JM. 2019. Model of influenza virus acidification. *PLoS One*  
701 14:e0214448.
- 702 67. Ivanovic T, Rozendaal R, Floyd DL, Popovic M, van Oijen AM, Harrison SC. 2012.  
703 Kinetics of proton transport into influenza virions by the viral M2 channel. *PLoS One*  
704 7:e31566.
- 705
- 706

707 **Figure Legends**

708 **Fig. 1: The structure of M2 protein and helical wheel plot of amphipathic helix**

709 (A) Scheme of the M2 protein indicating the individual domains.

710 (B) The amino acid sequences of the amphiphilic region of M2 from the WSN strain and of  
711 the mutants investigated in this study.  $\langle\mu H\rangle$  (hydrophobic moment) and  $\langle H\rangle$   
712 (hydrophobicity) were calculated with heliquest (<http://heliquest.ipmc.cnrs.fr/>). The  
713 scrambled version of the WSN helix was generated with a tool  
714 (<https://peptidenexus.com/article/sequence-scrambler>).

715 (C) Helical wheel plots of the amphiphilic region of M2 WT and the M2 mutants. The arrow  
716 points to the hydrophobic face and its length corresponds to the hydrophobic moment. Amino  
717 acid sequences used to generate the wheel and the biophysical values in (B) started at R45,  
718 but excluded P63.

719

720 **Fig. 2: Growth curves, specific infectivity and stability of virus particles**

721 (A-B) Growth curves under multiple cycle growth conditions. MDCK II cells were infected  
722 with WSN WT or mutants at a m.o.i of 0.001. Culture supernatants were harvested at the  
723 indicated time points after infection and the virus titer was determined by plaque assay (A) or  
724 HA-assay (B). Asterisk (\*) indicates statistically significant differences between WT and  
725 mutants (\*  $P<0.05$ ; \*\*  $P<0.01$ , \*\*\*  $P<0.005$ ) according to a Student's t-test.

726 (C) Determination of the ratio of infectious to total hemagglutinating particles released at 34h  
727 and 47h post infection. Asterisks (\*) indicates statistically significant differences between WT  
728 and mutants (\*\*  $P<0.01$ , \*\*\*  $P<0.005$ , \*\*\*\*  $P<0.0005$ ) according to a Student's t-test.

729 (D) Determination of the ratio of infectious to genome containing particles released at 34h  
730 post infection. RNA was extracted from the same volume of culture supernatant. The copy  
731 number for gene segment M and NA were determined by RT-qPCR. The ratio of the PFU



732 titers to vRNA copy numbers for three different infections is shown as means±standard  
733 deviation for each virus and gene segment.

734 (E) Growth curves under single cycle growth conditions. MDCK II cells were infected with  
735 WSN WT or mutants at an m.o.i. of 1 and culture supernatant was harvested at 6h and 9h post  
736 infection. Virus titer was determined by plaque assay. The asterisk (\*) indicates statistically  
737 significant differences between WSN WT and mutant ALPS (\* P<0.05).

738 (F) Stability of WSN WT and mutants.  $2 \times 10^5$  PFU of the indicated viruses were incubated at  
739 37°C for the indicated time period and its titer was determined by plaque assay.

740

### 741 **Fig. 3: Transmission electron microscopy of infected cells**

742 (A-I): Representative ultrathin sections of MDCK II cells infected with (A) WSN WT,  
743 (B-C) WSN ALPS, (D-F) WSN Epsin and (G-I) WSN RW16. Scale bars: 100 nm.

744

### 745 **Fig. 4: M2 expression and surface transport in infected cells**

746 (A) Fluorescence microscopy of MDCK II cells infected with WSN WT and mutant virus.  
747 Cells were infected at a m.o.i of 1, fixed and permeabilized at 4.5h p. i. and stained with anti-  
748 M2 mAb14C2 and secondary antibody coupled to Alexa Fluor 488. Note that the images of  
749 ALPS and Epsin were generated with longer exposure times. Mock: uninfected cells. Scale  
750 bar: 20  $\mu$ m.

751 (B) Quantification of M2's expression levels by flow cytometry. Infected MDCK II cells were  
752 fixed at 4.5h p. i. and either directly stained with anti-M2 mAb 14C2 (= surface expression)  
753 or permeabilized prior to staining (= total expression). The mean fluorescence intensity from  
754 at least 100.000 cells was determined by flow cytometry. Results were normalized against  
755 surface expression of WSN WT (=1) for each infection and relative surface expression is  
756 plotted against total expression for each virus. Results from three individual infections are



757 shown as means  $\pm$  standard deviation. The asterisks indicate statistically significant  
758 differences between WSN WT and mutants ALPS and Epsin (\* P<0.05), \*\* P<0.01, \*\*\*  
759 P<0.005) according to a Student's t-test.

760 (C) Calculation of the relative surface expression divided by the total expression from the data  
761 shown in (B). A Student's t-test does not reveal any significant difference between WT and  
762 any of the mutants.

763

#### 764 **Fig. 5: M2 incorporation into virus particles**

765 (A) Gradient purified viruses were subjected to reducing SDS-PAGE and blotted. The  
766 membrane was cut between the 28 and 17 kDa molecular mass markers and M1 (left) and M2  
767 (right) were detected by western blotting. The molecular mass markers (kDa) are shown on  
768 the left. Samples were equally loaded by volume without any standardization. Determination  
769 of the intensity of the two M2 bands revealed that M2 WT has the highest ratio of the lower  
770 15 kDa band relative to the upper 17 kDa (4.9, mean of 3 experiments). The ratio is reduced to  
771 2.7 in M2 RW16, to 2.1 in M2 Epsin and to 1.6 in M2 ALPS.

772 (B) Quantification of the ratio of M2 to M1. The density of M1 and M2 bands were  
773 determined, the ratio of M2 to M1 were calculated and normalized to WSN WT. Results from  
774 three virus preparations are shown as mean $\pm$ standard deviation. Asterisks indicate statistically  
775 significant differences between WT and mutants (\*\*\* P<0.005, \*\*\*\* P<0.0005) according to  
776 a Student's t-test.

777 (C) Gradient purified viruses were subjected to non-reducing SDS-PAGE and western-blot  
778 with M2 antibodies to analyze oligomerization of M2.  $\Delta$ : monomer, #: dimer, \*: tetramer.

779

#### 780 **Fig. 6: Protein composition of virus particles**

781 (A) Gradient purified viruses were subjected to non-reducing SDS-PAGE and Coomassie

782 staining. The position of HA0, NP and M1 are shown on the right and the molecular mass  
783 markers (kDa) are shown on the left. Samples were equally loaded by volume without any  
784 standardization.

785 (B) Western-blot of WSN WT and WSN ALPS virus preparations separated under non-  
786 reducing (Non) or reducing (Re) conditions using antibodies against M1.

787 (C) Quantification of the relative protein composition. The densities of HA0, NP and both M1  
788 bands from this and two other preparations were determined, and the relative percentage of  
789 each protein was calculated. Results are shown as mean  $\pm$  standard deviation. Two asterisks  
790 (\*\*  $P < 0.01$ ) indicates statistically significant differences between WT and mutants according  
791 to a Student's t-test.

792

### 793 **Fig. 7: Proton channel activity of M2**

794 293 cells were transfected with a plasmid encoding eYFP and 24 hours later infected with the  
795 indicated influenza viruses. 6 hours later cells were detached from the culture plate, washed  
796 and dissolved in either neutral buffer (pH 7.2, A) or acidic buffer (pH 5.5, B) and the  
797 fluorescence intensity of at least 10000 cells was measured every 40 second by FACS for 7  
798 (A) or 9 (B) minutes. eYFP: cells transfected with plasmid encoding eYFP. Results from four  
799 independent experiments were normalized to WSN WT and the resulting mean fluorescence  
800 intensity (MFI) is plotted against the time. Solid lines represent curve fits to one-phase  
801 exponential-decay models, the calculated k-values are indicated for each M2. An aliquot of  
802 cells was stained with M2 antibodies and calculation of relative surface exposure of M2  
803 revealed a reduction relative to WSN WT (=100%) to 80% for WSN ALPS and WSN Epsin  
804 and to 95% for WSN RW16.

**A**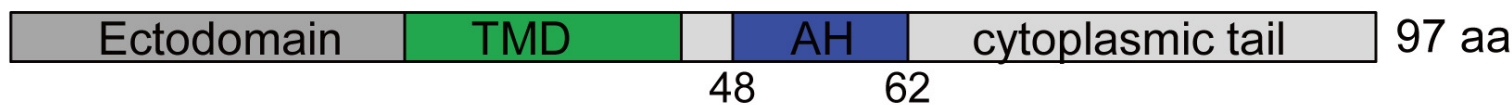**B**

|                   | Sequence                                          | $\langle \mu H \rangle$ | $\langle H \rangle$ |
|-------------------|---------------------------------------------------|-------------------------|---------------------|
| M2 WT             | $^{45}\text{RLF}$ FKCIYRRFKYGLKRG $\text{P}^{63}$ | 0.39                    | 0.39                |
| $\Delta\text{AH}$ | $^{45}\text{RLF}$ -----P                          |                         |                     |
| sWSN              | $^{45}\text{RLF}$ KYGCFRYFIKRGKLRP                | 0.11                    | 0.39                |
| ALPS              | $^{45}\text{RLF}$ FLNSAMSSLYSGWSSFTTGASKFASP      | 0.31                    | 0.54                |
| Epsin             | $^{45}\text{RLF}$ SSLRRQMKNIVHNP                  | 0.61                    | 0.25                |
| RW16              | $^{45}\text{RLF}$ RRWRRWRRWRRWRRP                 | 0.98                    | 0.31                |

**C**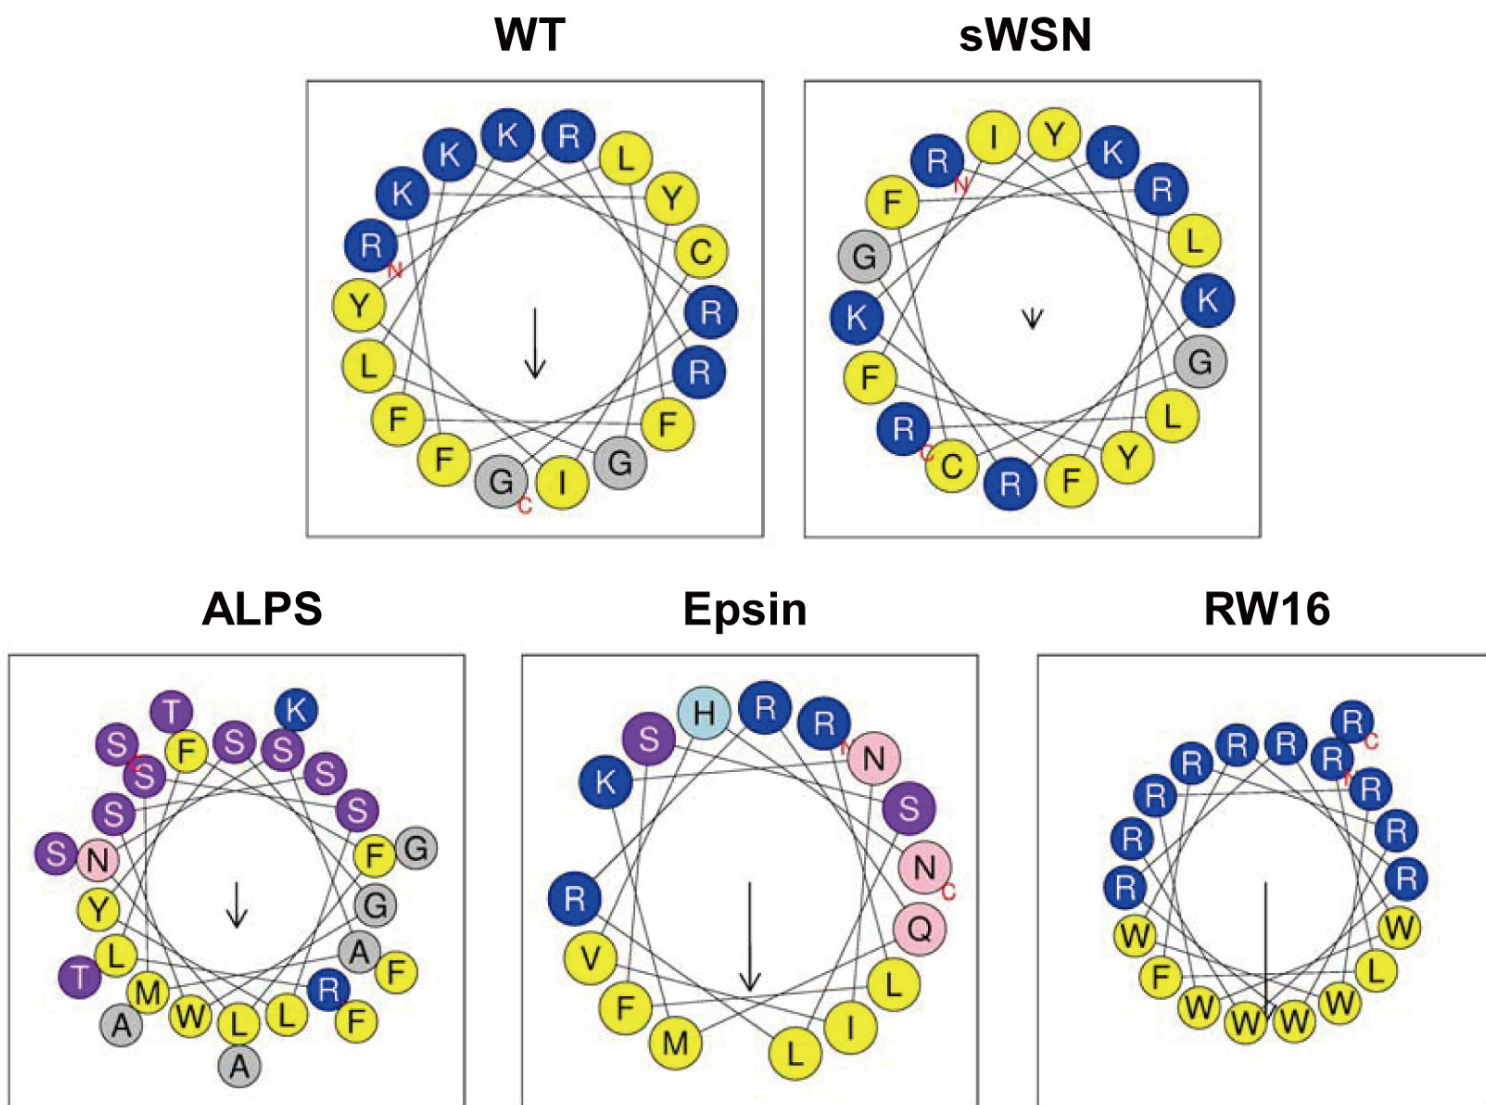

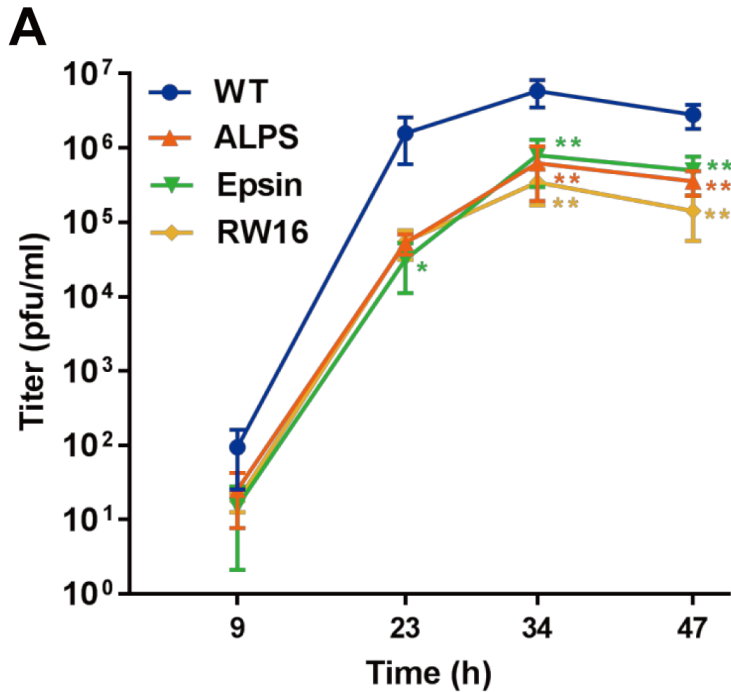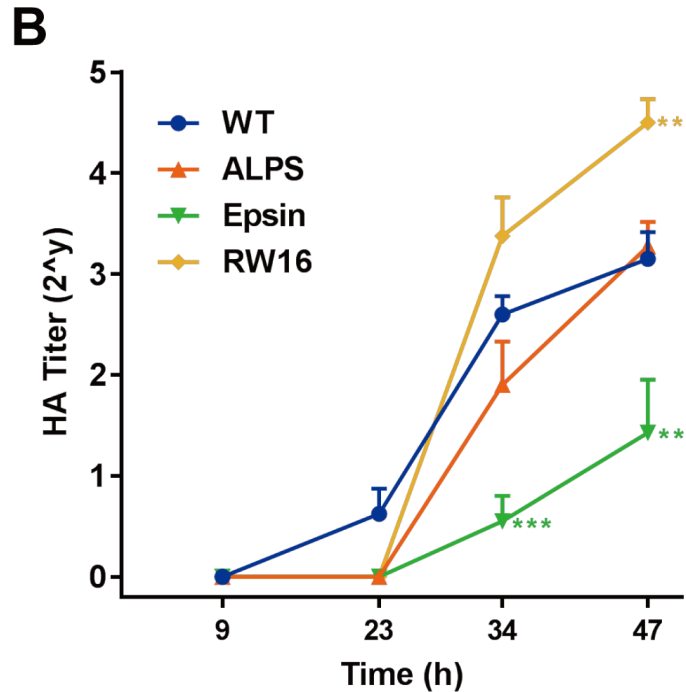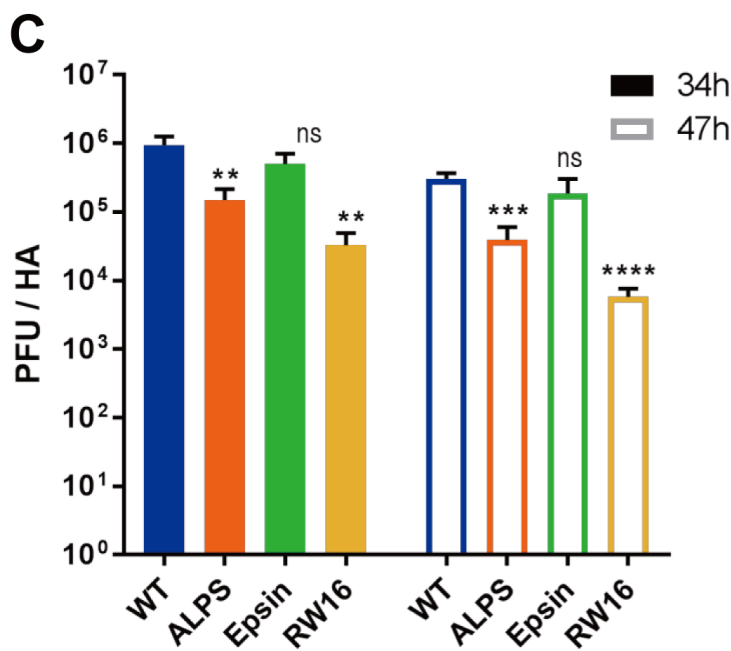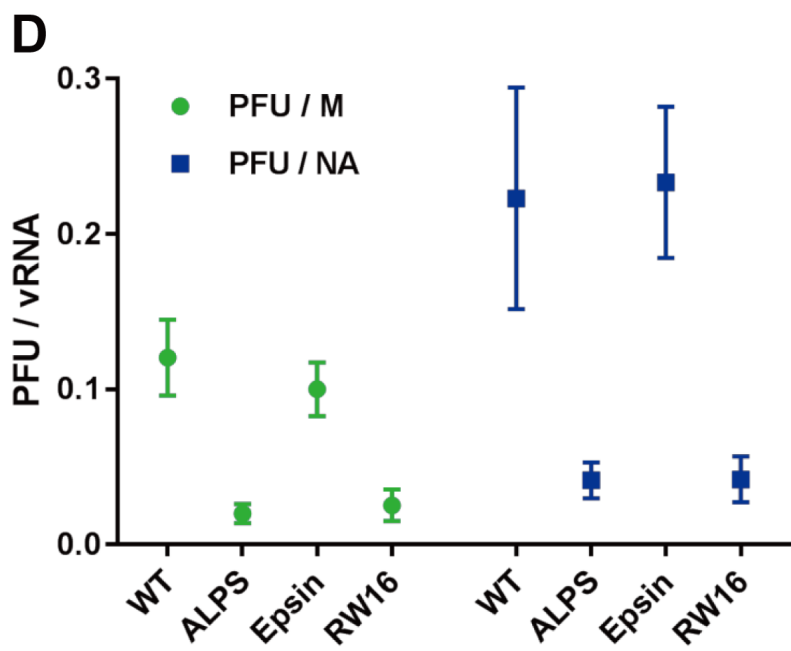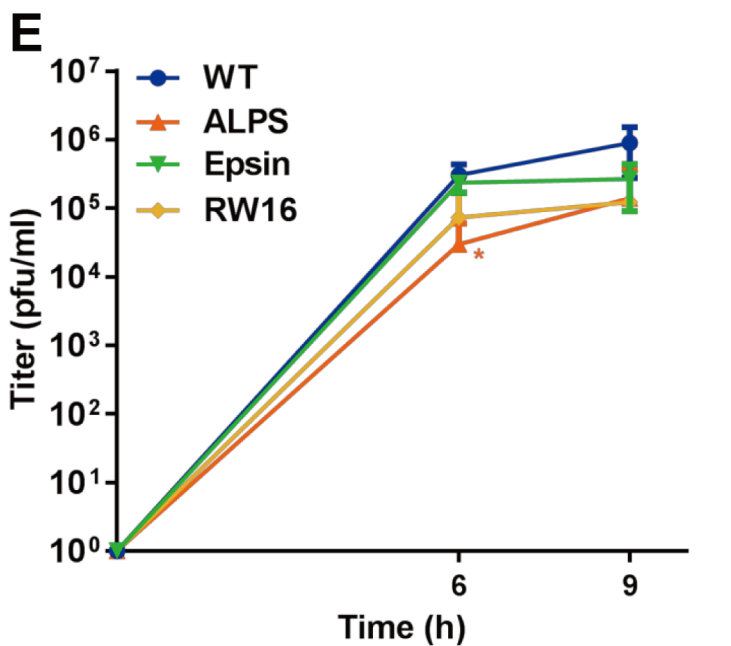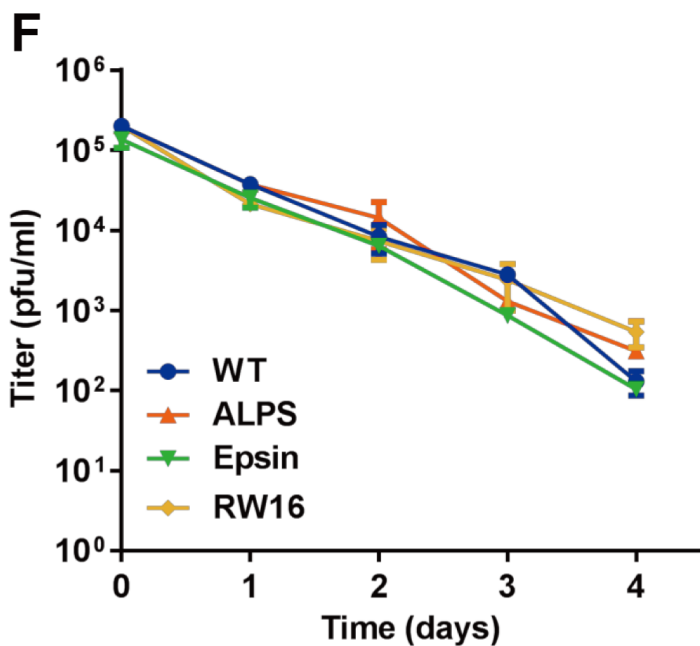



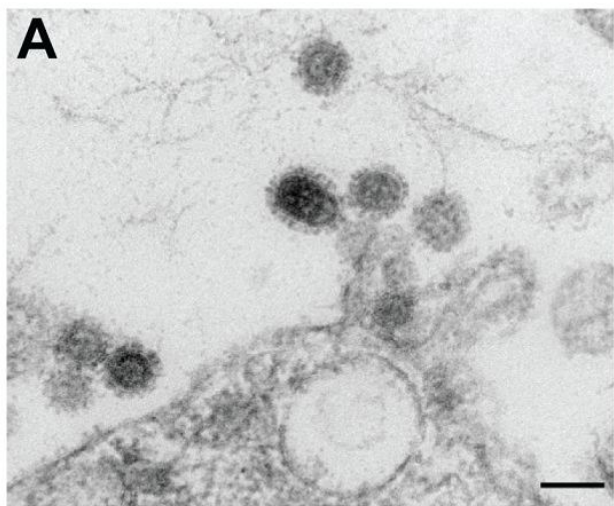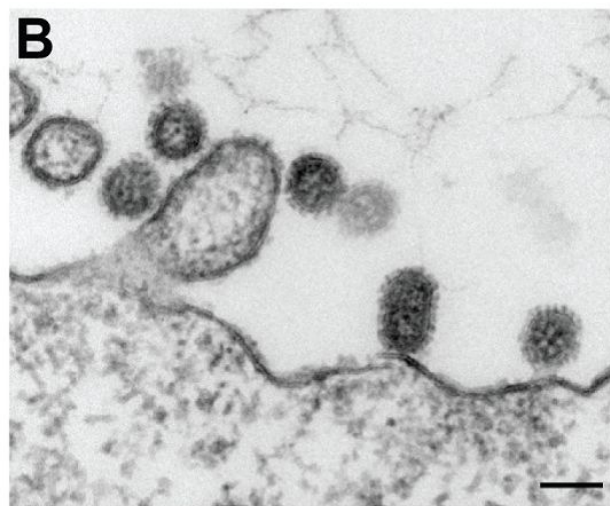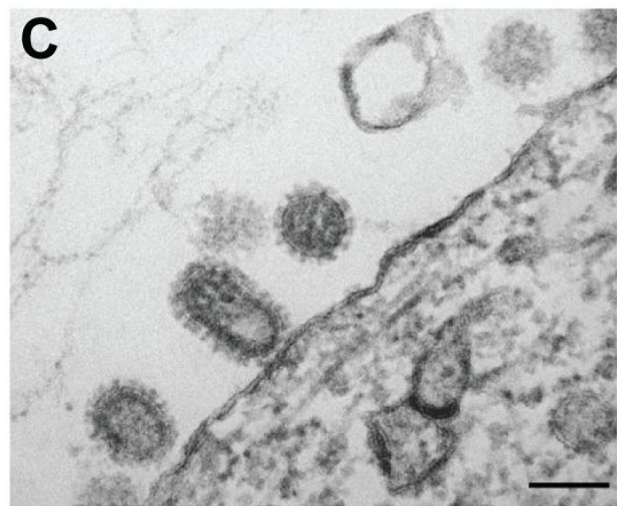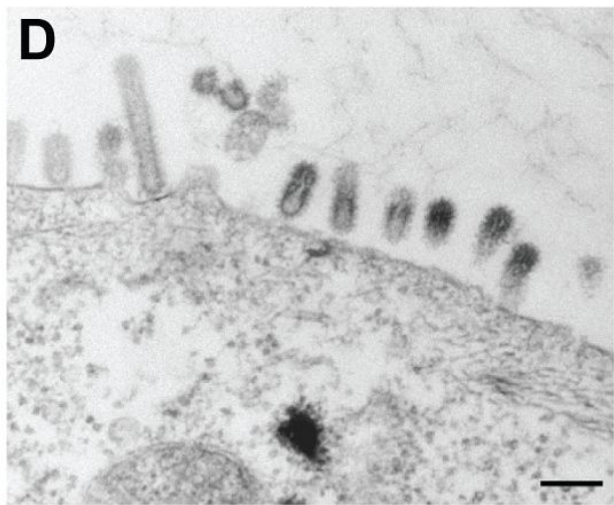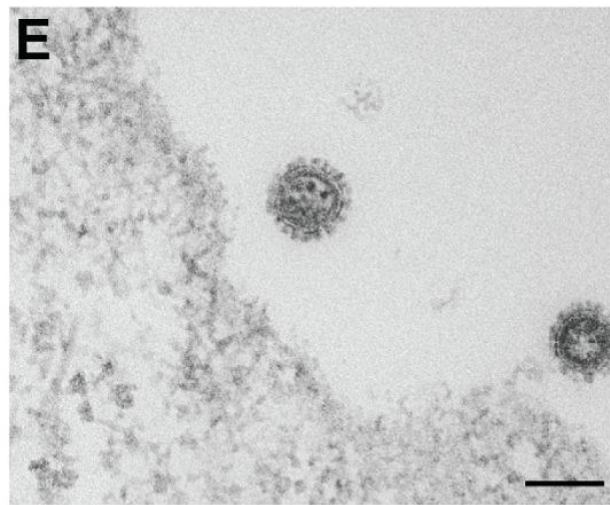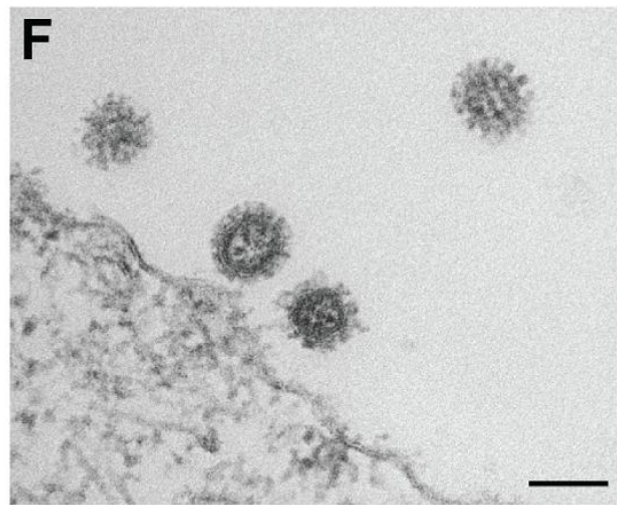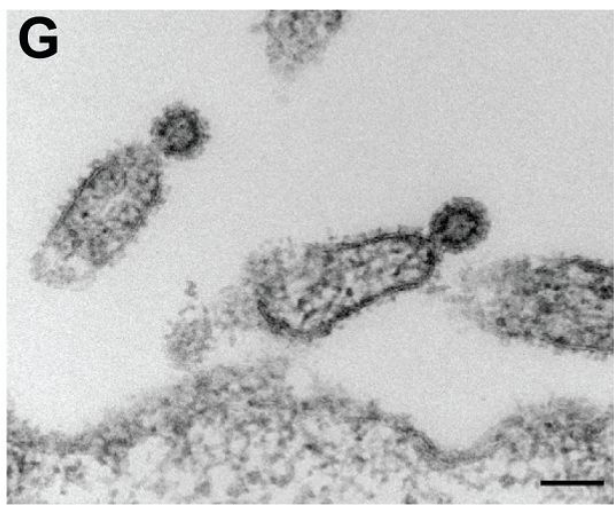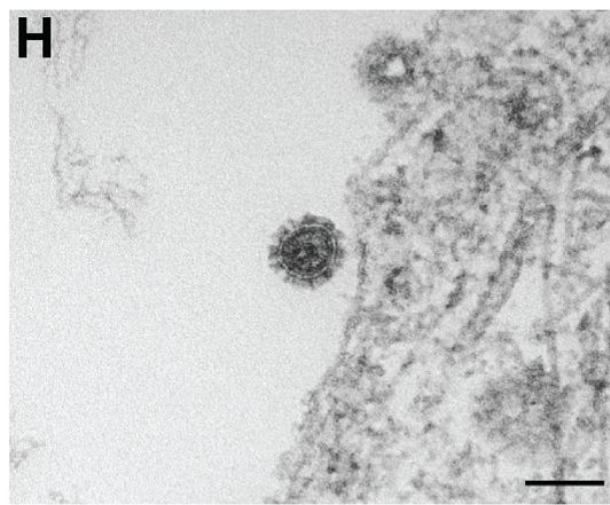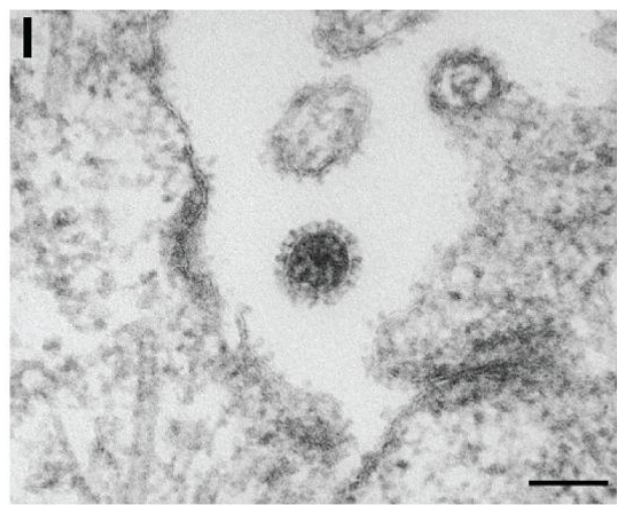

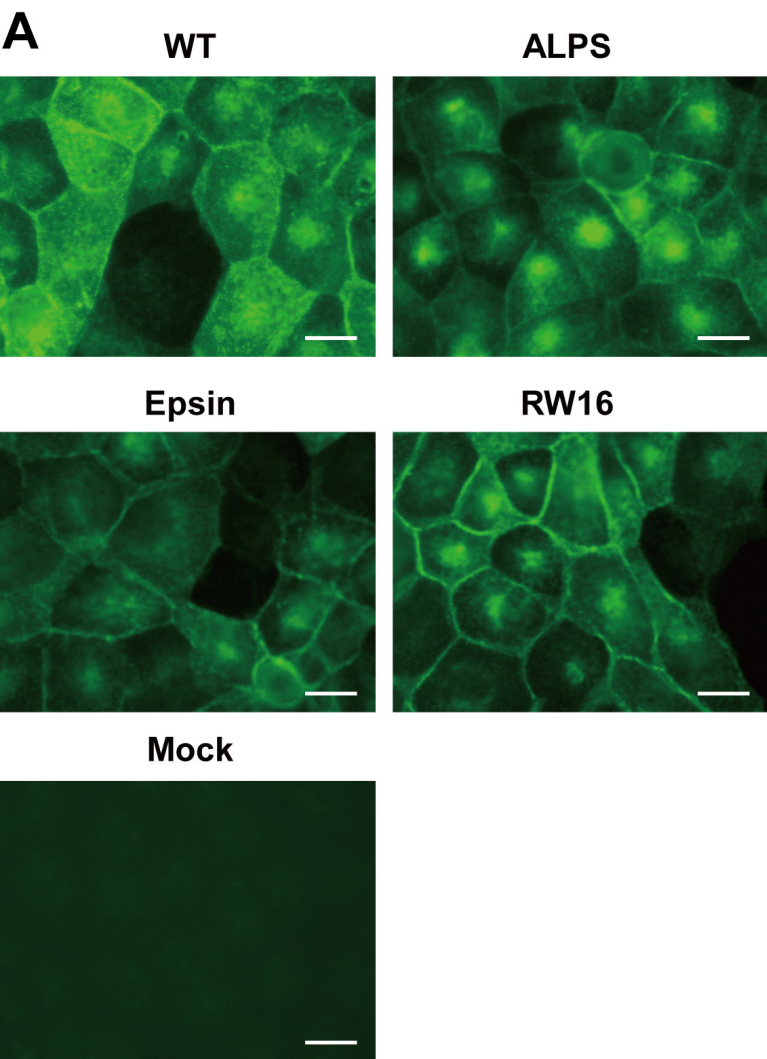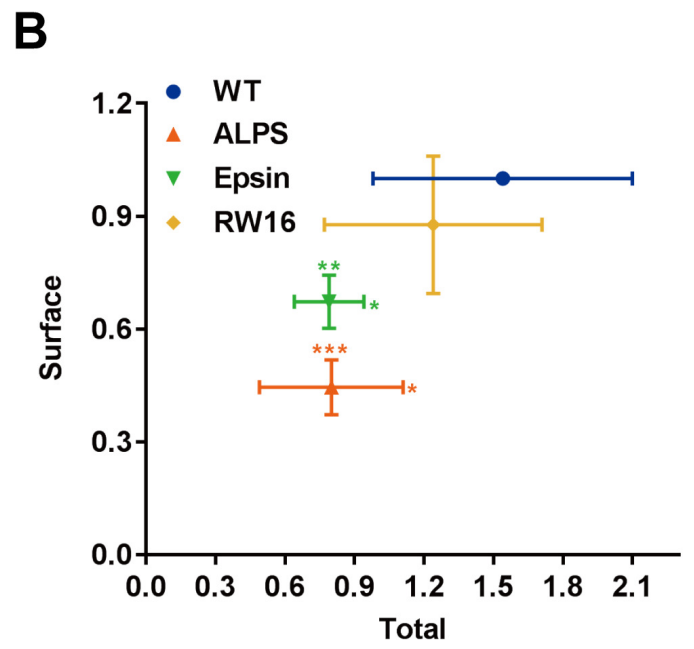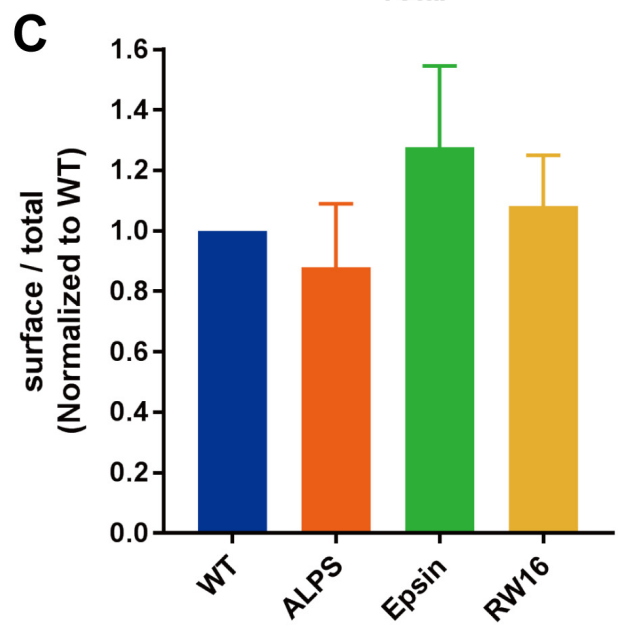



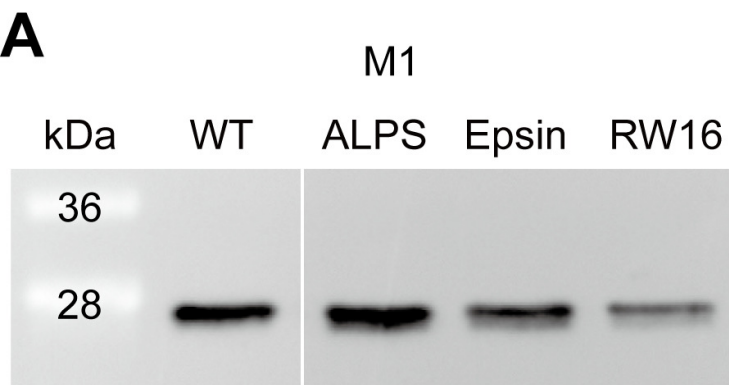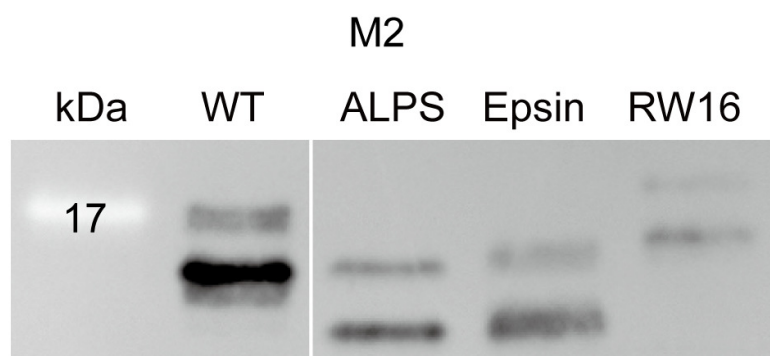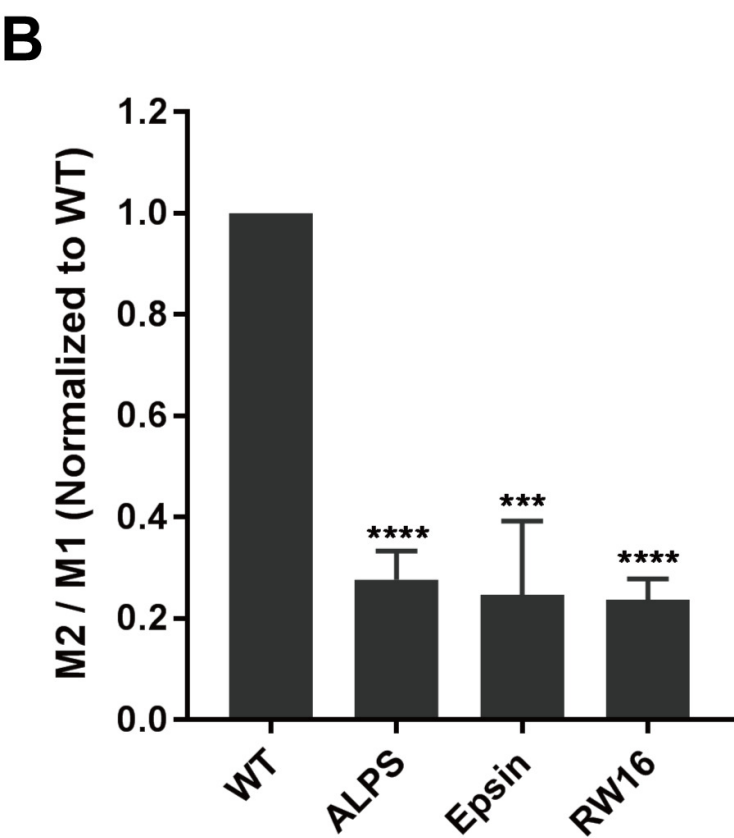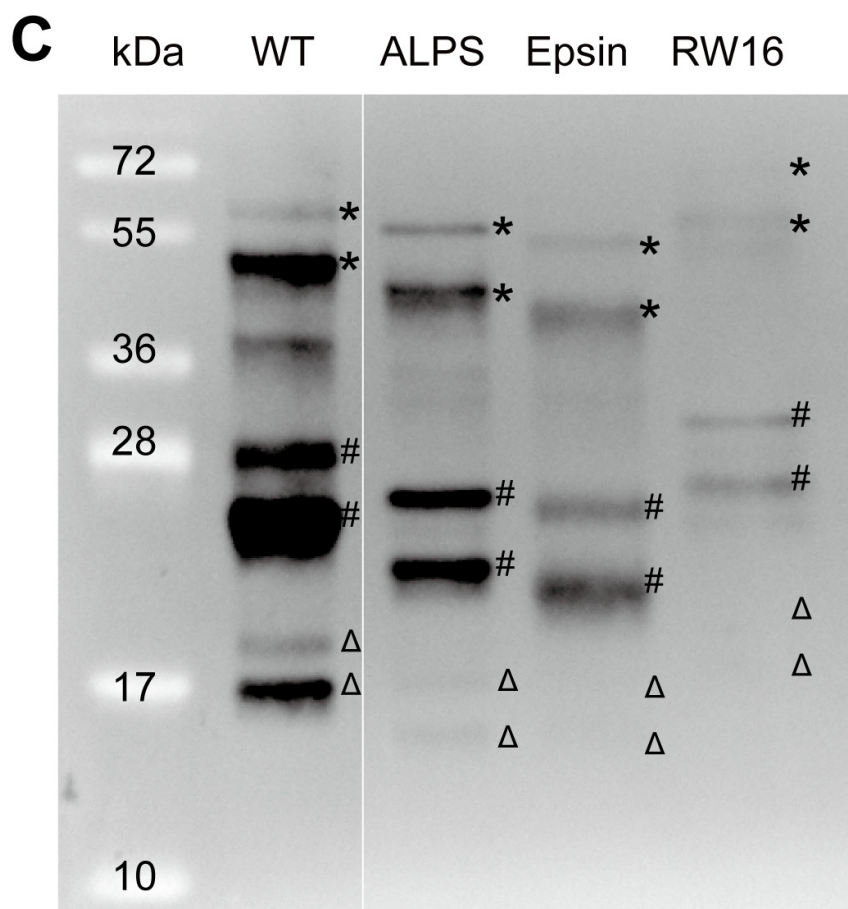

**A**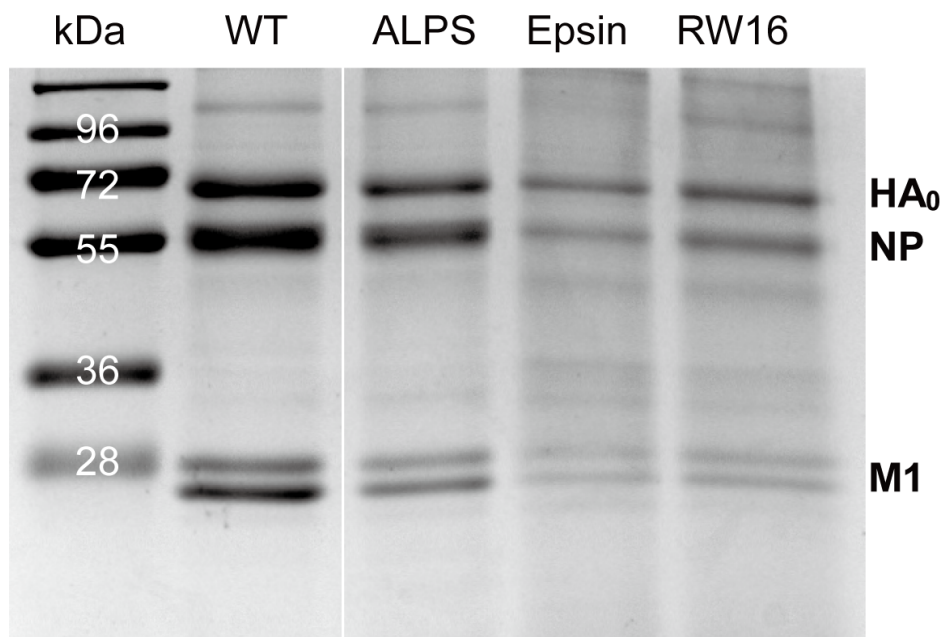**B**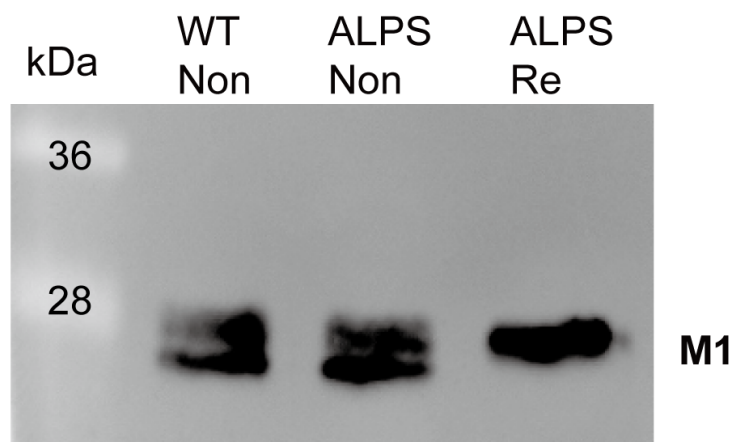**C**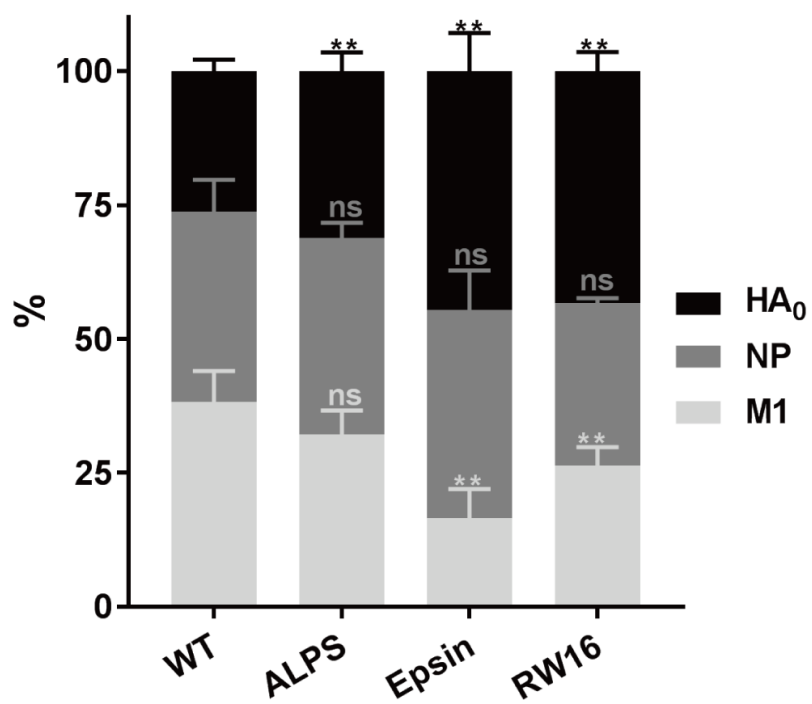



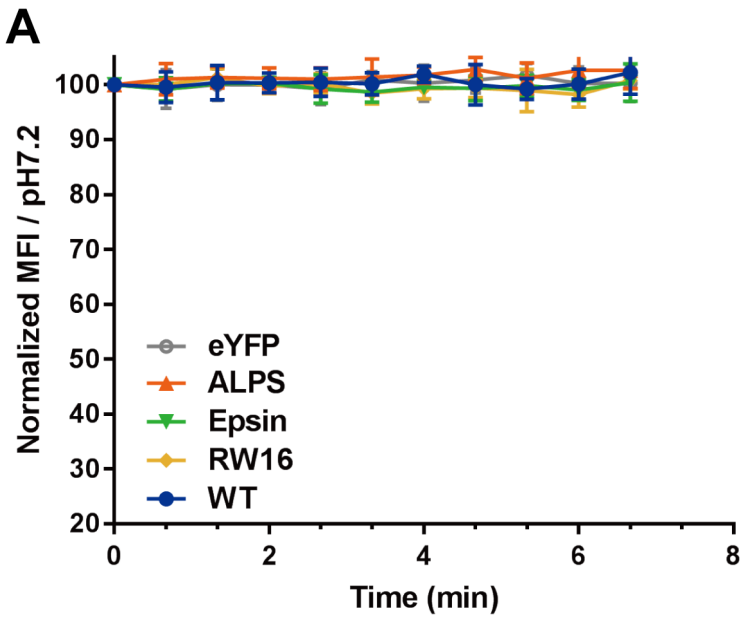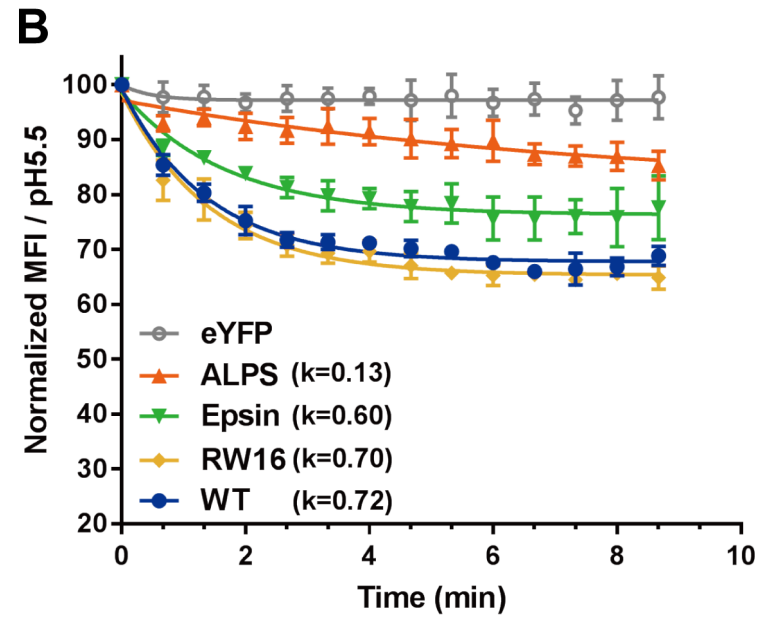

Source: https://www.biorxiv.org/content/biorxiv/early/2019/09/23/776864.full.pdf
